1           **Ubiquity of the Symbiont *Serratia symbiotica* in the Aphid Natural Environment:**  
2                         **Distribution, Diversity and Evolution at a Multitrophic Level**

3  
4           Inès Pons<sup>1\*</sup>, Nora Scieur<sup>1</sup>, Linda Dhondt<sup>1</sup>, Marie-Eve Renard<sup>1</sup>, François Renoz<sup>1</sup>, Thierry Hance<sup>1</sup>

5  
6           <sup>1</sup> Earth and Life Institute, Biodiversity Research Centre, Université catholique de Louvain, 1348,  
7                                 Louvain-la-Neuve, Belgium.

8  
9  
10       **\* Corresponding author:**

11       Inès Pons

12       Croix du Sud 4-5, bte L7.07.04, 1348 Louvain la neuve, Belgique

13       ines.pons@uclouvain.be  
14  
15  
16  
17  
18  
19  
20  
21  
22  
23  
24

25 **ABSTRACT**

26 Bacterial symbioses are significant drivers of insect evolutionary ecology. However, despite recent  
27 findings that these associations can emerge from environmentally derived bacterial precursors, there  
28 is still little information on how these potential progenitors of insect symbionts circulates in the trophic  
29 systems. The aphid symbiont *Serratia symbiotica* represents a valuable model for deciphering  
30 evolutionary scenarios of bacterial acquisition by insects, as its diversity includes intracellular host-  
31 dependent strains as well as gut-associated strains that have retained some ability to live independently  
32 of their hosts and circulate in plant phloem sap. These strains represent a potential reservoir for the  
33 emergence of new and more intimate symbioses. Here, we conducted a field study to examine the  
34 distribution and diversity of *S. symbiotica* found in aphid populations, as well as in different  
35 compartments of their surrounding environment. A total of 250 aphid colonies, 203 associated insects,  
36 and 161 plant samples associated with aphid colonies were screened for *S. symbiotica*. Twenty percent  
37 of aphids were infected with *S. symbiotica*, and the symbiont includes a wide diversity of strains with  
38 varied tissue tropism corresponding to different lifestyle. We also showed that the prevalence of *S.*  
39 *symbiotica* is influenced by seasonal temperatures. For the first time, we found that *S. symbiotica* was  
40 present in non aphid species and in host plants, and that the prevalence of the bacterium in these  
41 samples was higher when associated aphid colonies were infected. Furthermore, phylogenetic analyses  
42 suggest the existence of horizontal transfers between the different trophic levels examined. These  
43 results provide a completely new picture of the ubiquity of an insect symbiont in nature. They suggest  
44 that ecological interactions promote the dissemination of strains that are still free-living and poorly  
45 specialized, and for which plants are a probable reservoir for the acquisition of new bacterial partners  
46 in insects.

47

48 **Keywords:** Symbiosis, Gut symbiont, Horizontal transfer, Insects, Host plants.

## 49 INTRODUCTION

50 Numerous studies have revealed the diversity of microbial symbiotic associations in insects and their  
51 role in adapting to particular lifestyles or diets deficient in certain elements (Moran 2007; Douglas  
52 2011; McFall-Ngai et al. 2013). Many insect species that have specialized on nutritionally unbalanced  
53 foods depend on obligate symbionts to synthesize deficient nutrients in their diets (Douglas 1998;  
54 Moran and Baumann 2000; Baumann et al. 2013). Obligate nutritional symbioses represent key  
55 evolutionary innovations, allowing insects to diversify in ecological niches otherwise inaccessible  
56 (Wernegreen 2017). Insects can also harbor facultative symbionts that are often involved in more  
57 recent associations and affect a wide range of host life history traits, even if they are not essential for  
58 host survival (Oliver et al. 2010; Feldhaar 2011; Heyworth and Ferrari 2015). Depending on the  
59 ecological context, facultative symbionts may act as mutualistic partners providing benefits to hosts,  
60 but may also produce fitness costs (Russell and Moran 2006; Vorburger and Gouskov 2011; Oliver et  
61 al. 2014; Zytynska et al. 2021). They suggest that their persistence is determined by a balance of costs  
62 and benefits. In recent years, the origin of bacterial mutualism in insects has been well studied (Husník  
63 et al. 2011; Clayton et al. 2012; Sudakaran et al. 2017; Manzano-Marín et al. 2020), particularly in  
64 stink bugs that pick up environmental bacteria that become mutualistic partners in specialized cavities  
65 of their digestive tract (Kikuchi et al. 2007; Takeshita and Kikuchi 2017). However, there is still little  
66 data regarding how potential progenitors of insect symbionts circulate in the environment and to what  
67 extent these circulating bacteria can spread to different trophic levels.

68 Several successive evolutionary steps can be considered in the establishment of mutualistic  
69 symbioses between insects and bacteria: 1) an infection by a generalist bacterium that circulates in the  
70 trophic chain from the environment, 2) if this infection results in a loss of fitness, a reduction of  
71 virulence by selection of the most resistant hosts and the least virulent bacteria in successive  
72 coevolutionary processes, 3) a contribution of benefits in particular circumstances, benefits greater  
73 than fitness costs for the host, and which allow the establishment of a profitable association for both

74 partners under specific conditions, 4) the perpetuation of the association by a permanent reacquisition  
75 via a circulation of the symbiont in the trophic chain, 5) the establishment of horizontal and/or vertical  
76 transfers, and 6) the development of an increasingly tight relationships between the partners with a  
77 reduction in the size of the bacterial genome (Hosokawa et al. 2016; Latorre and Manzano-Marín 2017;  
78 Takeshita and Kikuchi 2017; Gil and Latorre 2019). Depending on the degree of evolution of these  
79 systems, each of these stages should still be observed or in many cases, the intermediate stages have  
80 disappeared over time, making the reconstruction of this evolutionary history more complex. In this  
81 evolutionary scheme, transmission mechanisms are known to be instrumental in the establishment and  
82 evolution of symbioses in natural host populations (Bright and Bulgheresi 2010). Although vertical  
83 transmission is the primary way by which symbioses are stably maintained (Salem et al. 2015),  
84 symbionts can also undergo occasional horizontal transfers or be acquired directly from the  
85 environment (Kikuchi et al. 2007; Gehrler and Vorburger 2012; Caspi-Fluger Ayelet et al. 2012;  
86 Łukasik et al. 2015; Hosokawa et al. 2016). Novel associations could emerge through these latter  
87 mechanisms, subsequently allowing the rapid acquisition of new ecological traits by insects and the  
88 expansion of host ranges for symbiotic bacteria (Su et al. 2013; Oliver et al. 2014).

89 In nature, the occurrence of bacterial strains capable of living freely outside of insects but  
90 related to insect endosymbionts suggests their potential role as source of insect symbionts. For  
91 example, a strain of the bacterium *Sodalis* isolated from a hand wound in a human host but originated  
92 from a dead tree branch was found to share a very close relationship with *Sodalis glossinidius* and  
93 other members of *Sodalis*-allied clade of insect symbionts (Clayton et al. 2012; Chari et al. 2015).  
94 *Arsenophonus* bacteria are known to infest plants while members of the genus are widely distributed  
95 in insect populations (Bressan et al. 2009; Jousset et al. 2013). *Erwinia* bacteria, generally described  
96 as phytopathogens, are also found associated with insects, such as aphids where it was first described  
97 as a gut associate (Harada and Ishikawa 1993; Harada et al. 1997; Nadarasah and Stavriniades 2011).  
98 More recently, some *Cinara* aphids have been found to harbor *Erwinia*-related obligate symbionts that

99 complement the ancestral obligate symbiont *Buchnera aphidicola* (Meseguer et al. 2017). Genomic  
100 analyses indicate that these associations originate from the acquisition of free-living *Erwinia* strains,  
101 likely acquired horizontally through plants, and have evolved into an intracellular lifestyle (Manzano-  
102 Marín et al. 2020). Taken together, all these findings support the hypothesis of the existence of an  
103 environmental pool of bacteria from which new intimate partnerships with insects can emerge. In  
104 addition to this, a growing number of studies have recently shown that symbiotic associations between  
105 insects and bacteria evolve in a very dynamic fashion, involving the acquisition of new symbionts,  
106 and/or the loss and replacement of established bacterial partners, even in the context of obligate  
107 associations established sometimes for millions of years (Koga and Moran 2014; Hosokawa et al.  
108 2016; Husnik and McCutcheon 2016; Manzano-Marín et al. 2017; Sudakaran et al. 2017; Chong and  
109 Moran 2018; Matsuura et al. 2018; Mao and Bennett 2020). For example, genomic analyses in aphids  
110 indicate that the dependence of some species on co-obligate symbiotic bacteria has arisen  
111 independently many times during their evolutionary history (Manzano-Marín et al. 2016, 2017;  
112 Meseguer et al. 2017; Manzano-Marín et al. 2020; Monnin et al. 2020). The repeated replacement of  
113 pre-existing symbionts by other microbial partners is now considered a redundant evolutionary process  
114 that occurs in many insect species, suggesting 1) the continuous formation of new mutualistic  
115 associations in nature, and 2) the existence of a pool of environmental symbionts from which new  
116 intimate, facultative, or obligate associations are formed in nature.

117 *Serratia symbiotica*, one of the most common symbionts in aphids (Oliver et al. 2010; Henry  
118 et al. 2015; Zytynska and Weisser 2016; Monnin et al. 2020), is a valuable candidate to decipher the  
119 origin and the evolution of bacterial mutualism in insects. It includes a great diversity of strains  
120 associated with very distinct biological features and reflecting the various associations that bacteria  
121 can share with insects (Burke and Moran 2011; Manzano-Marín and Latorre 2016; Pons et al. 2019a;  
122 Monnin et al. 2020; Perreau et al. 2020). The strains studied in aphids of the subfamily *Aphidinae* have  
123 been first described as intracellular facultative partners because they can invade host cells (including

124 bacteriocytes and sheath cells), and can be associated with protective phenotypes (against parasitoids  
125 and high temperatures) (Oliver et al. 2003; Burke et al. 2009; Heyworth and Ferrari 2015). *S.*  
126 *symbiotica* strains associated with aphids of the subfamilies Lachninae and Chaitophorinae are  
127 intracellular symbionts involved in co-obligate associations, compensating some metabolic capacities  
128 lost by the ancient obligate symbiont *B. aphidicola* (Lamelas et al. 2011; Manzano-Marín and Latorre  
129 2014, 2016; Manzano-Marín et al. 2018; Monnin et al. 2020). Moreover, the species *S. symbiotica* also  
130 includes strains that are gut-associates (Renoz et al. 2018; Pons et al. 2019a; Perreau et al. 2020) and  
131 which can be cultivated freely on a pure artificial medium (Sabri et al. 2011; Grigorescu et al. 2017).  
132 These strains, slightly pathogenic to aphids, are considered to be at the pathogen-symbiont interface  
133 (Pons et al. 2019a; Perreau et al. 2020). We recently showed that these gut-associated strains that retain  
134 some free-living capacities, are extracellularly transmitted via contamination with honeydew (Pons et  
135 al. 2019a) and/or through the plant phloem (Pons et al. 2019b). They can be horizontally transferred  
136 between aphids through host plant, and their uptake by plant roots can induce new bacterial infections  
137 of aphids, as well as positive fitness effects on the host plant (Pons et al. 2019b). A field study also  
138 suggest that *S. symbiotica* may reside in the gut of ants tending aphids (Renoz et al. 2018). Taken  
139 together, these results indicates that certain *S. symbiotica* strains have a tremendous ability to circulate  
140 from one compartment to another, with an aptitude to perform horizontal transfers between both  
141 phylogenetically close and distant species in the environment. We suggest that these strains may thrive  
142 in the environment where aphids prosper and could provide an environmental source for the  
143 establishment of new symbiotic associations between aphids and bacteria.

144 While *S. symbiotica* strains with a broad spectrum of infection may represent ideal candidates  
145 to refine our understanding of evolutionary scenarios of symbiont acquisition, we still do not know  
146 how *S. symbiotica* strains are distributed in nature, how they circulate and how they spread in aphid  
147 populations. To address these issues, we conducted a field study to provide comprehensive picture of  
148 the ubiquity of *S. symbiotica* across the food web. We investigated the distribution, diversity and

149 evolution of *S. symbiotica* infections at a multitrophic level, including 58 aphid species, aphid-  
150 interacting insects (i.e. predators, parasitoids, etc.), and host plants. This study allowed us 1) to  
151 examine the prevalence of *S. symbiotica* in aphids and their environment, and to detect environmental  
152 and ecological factors that influence its prevalence, 2) to determine the diversity of tissue tropism  
153 exhibited by *S. symbiotica* in natural insect populations, and 3) to investigate the propensity of *S.*  
154 *symbiotica* to circulate and be transferred horizontally in the natural environment of aphids. Using  
155 diagnostic PCR, fluorescence *in situ* hybridization and phylogenetic approaches, we provide a picture  
156 of the diversity and the ubiquity of *S. symbiotica* in a natural environment. Our study highlights the  
157 presence of *S. symbiotica* strains at different levels of food webs and suggests the existence of  
158 ecological compartments for the exchange and acquisition of *S. symbiotica* in insects, serving as  
159 potential interfaces for the emergence of new symbiotic associations.

160

## 161 **MATERIALS AND METHODS**

### 162 **Sample collection**

163 To get a comprehensive picture of the ubiquity of *S. symbiotica* in the natural aphid environment, we  
164 sampled 1) aphid colonies of different species, 2) insects potentially in interaction with aphids in the  
165 sampled colonies, and 3) the host plant. Sampling was carried out to maximize the diversity of aphid  
166 subfamilies and genera, representing 3 subfamilies of Aphididae, 27 genera and 58 species. Field  
167 specimens were sampled between May and August 2018 on various host plants at several locations in  
168 Belgium (Walloon Brabant province) (Table S1). The sampling also includes some aphids sampled in  
169 Italy, France, Germany and Rwanda (2017). A total of 614 samples were collected, containing 250  
170 aphid colonies, 203 insects associated with aphid colonies (tending ants, hoverfly larvae, larvae and  
171 adults of ladybugs, parasitoids, bugs, aphid midge larvae, moth larvae, fly larvae and lacewing larvae),  
172 and 161 host plant samples (Table S1). To minimize the risk of pseudo-replicating, *S. symbiotica*  
173 infection was verified in only one pool of aphids per host plant. When insects were observed within

174 aphid colonies, individuals were systematically collected and preserved in 90% ethanol at room  
175 temperature until use. Plant samples (stem and leaf pieces) associated with the sampled aphid colonies  
176 were also systematically collected and stocked at -80°C. For samples collected in Belgium, the mean  
177 daily temperatures and the maximum daily temperatures during the different months of sampling in  
178 Belgium were obtained via the database of IRM (Institut Royal Météorologique) of Belgium and the  
179 meteobelgique.be website (Table S1).

180

### 181 **DNA extraction**

182 Insect DNA extraction was performed using a high salt-extraction method (Aljanabi and Martinez  
183 1997). Extraction was carried out on a pool of two to six aphids from each colony and on a pool of  
184 two to three individuals for associated tending ants and larvae (Jousselin et al. 2013; Renoz et al. 2018).  
185 Pools were carried out to avoid the risk of missing infection, when *S. symbiotica* is present. For the  
186 other associated insects, extraction was performed on a single individual. Plant DNA was extracted  
187 using the CTAB method (Doyle 1991). Prior to extraction, plant samples were surface-sterilized with  
188 99% ethanol, 10% bleach, and rinsed with sterile water.

189

### 190 **Insect identification**

191 For insect species identification, the primers LepF and LepR (presented in Table S2) were used to  
192 amplify the target 658-bp fragment of cytochrome c oxidase subunit I (COI) gene (D'acier et al. 2014).  
193 PCR reactions were conducted in a final volume of 15 µl containing 1µl of the template DNA lysate,  
194 0.5 µM of each primer, 200 µM dNTPs, 1 × buffer and 0.625 unit of Taq DNA polymerase (Roche).  
195 The thermocycling profile consisted of 94°C for 1 min; 6 cycles of 94 °C for 1 min, 45 °C for 1 min  
196 and 30 s, and 72 °C for 1 min and 15 s; followed by 36 cycles of 94°C for 1 min, 51°C for 1 min and  
197 30 s, and 72 °C for 1 min and 15 s; with a final 5 min extension period of 72°C. Amplicons were then  
198 purified before sequencing (Macrogen Inc., Amsterdam). The resulting sequences were cleaned and



199 aligned using Geneious® v9.1.5 (Kearse et al. 2012) and insects were identified by comparing  
200 resulting COI sequence data to the GeneBank nucleotide database using BLAST.

201

### 202 **Diagnostic screening for *S. symbiotica***

203 All samples were tested for the presence of *S. symbiotica* using PCR assays based on the 16S rRNA  
204 gene using the specific primers 16SA1 and PASScmp (presented in Table S2). PCR amplification was  
205 performed as previously described (Pons et al. 2019a). PCR reactions were conducted in a final volume  
206 of 15 µl containing 1µl of the template DNA lysate, 0.5 µM of each primer, 200 µM dNTPs, 1X buffer  
207 and 0.625 unit of Taq DNA polymerase (Roche). The thermocycling profile consisted of 95°C for  
208 5min; 35 cycles at 95 °C for 30 sec, 55 °C for 1 min 30 s and 72 °C for 1 min 30s; 72°C for 7 min.  
209 DNA from an infected line of the pea aphid *A. pisum* was used as a positive control (Burke et al. 2009)  
210 and in addition to the negative control, DNA from an uninfected line of the black bean aphid *A. fabae*  
211 was used as a negative control (Vorburger and Gouskov 2011). Amplicons were purified and  
212 sequenced in both directions (Macorgens Inc., Amsterdam). Sequence alignments were done using  
213 Geneious® v9.1.5 (Kearse et al. 2012) and compared to sequences on GenBank using BLAST. The  
214 sequences were deposited in GenBank.

215

### 216 **Phylogenetic analyses**

217 The diversity of *S. symbiotica* strains was also characterized using the partial sequence of four  
218 housekeeping genes *accD*, *gyrB*, *murE* and *recJ* (Table S2) (Henry et al. 2013; Łukasik et al. 2015).  
219 DNA samples that were found positive for *S. symbiotica* were subjected to PCR amplification under  
220 the following conditions: initial denaturation at 94°C for 5 min; 35 cycles of denaturation at 94°C for  
221 30 s, annealing at 60-64°C depending on primers for 30s, extension at 72°C for 1 min; a final extension  
222 at 72°C for 5 min (Renoz et al. 2018). Amplicons were then purified and sequenced in both directions

223 (Macrogen Inc., Amsterdam). Sequences obtained were cleaned and aligned using Geneious® v9.1.5  
224 (Kearse et al. 2012).

225 Phylogenetic associations were analyzed for 54 *S. symbiotica* strains obtained in this work,  
226 sequences from the three cultivable *S. symbiotica* strains that were isolated in our laboratory (Sabri et  
227 al. 2011; Foray et al. 2014; Grigorescu et al. 2017; Renoz et al. 2020), eight sequences from *S.*  
228 *symbiotica* that were found in a recent field study (from aphids collected in Belgium in summer 2015)  
229 (Renoz et al. 2018) and twelve sequences from *S. symbiotica* whose genomes have been sequenced  
230 and available in Genbank (Burke and Moran 2011; Lamelas et al. 2011; Manzano-Marín and Latorre  
231 2014; Manzano-Marín et al. 2016; Meseguer et al. 2017; Manzano-Marín et al. 2018; Nikoh et al.  
232 2019; Monnin et al. 2020). *Serratia proteamaculans* 568 was used as outgroup. All sequences are  
233 available in GenBank (Table S3). SeaView v4.6.1 was used to align sequences, and all ambiguously  
234 aligned regions identified by GBlocks v0.91b (Castresana 2000) were eliminated, as were regions of  
235 incomplete data at the 3' and 5' ends of the targeted regions. PartitionFinder v1.1.0 (Lanfear et al. 2012)  
236 was used to determine the substitution model for each gene. Phylogenetic analysis was performed by  
237 Bayesian inference methods with MrBayes v3.2.7a (Ronquist et al. 2012). Indels were treated as  
238 missing data. Four Markov chain Monte Carlo (MCMC) simulations were run independently for  
239 10,000,000 generations. Trees and model parameters were sampled every 10,000 generations.  
240 Convergence of the MCMCs was estimated in three ways: (1) the standard deviation of split  
241 frequencies was  $< 0.01$ , (2) visual inspection of the plot of the log-likelihood score at each sampling  
242 point suggested that the four chains reached stationarity, and (3) the posterior probability plots of all  
243 splits for paired MCMC runs showed high correlation, which diagnosed convergence among the four  
244 chains (Nylander et al. 2008). The trees of the burn-in for each run were excluded from the tree set,  
245 and the remaining trees from each run were combined to form the full sample of trees assumed to be  
246 representative of the posterior probability distribution.

247

## 248 **Localization of *S. symbiotica***

249 To determine the tissue tropism of *S. symbiotica* strains in aphids and in the other insects sampled in  
250 the colonies, whole-mount fluorescence *in situ* hybridization (FISH) was carried out as described in  
251 (Koga et al. 2009; Renoz et al. 2018; Pons et al. 2019a). All insect samples positive to *S. symbiotica*  
252 were tested. The following oligonucleotide probes were used: Cy5-ApisP2a (5'-Cy5-  
253 CCTCTTTTGGGTAGATCC-3') targeting 16S rRNA of *B. aphidicola* and Cy3-PASSisR (5'-Cy3-  
254 CCCGACTTTATCGCTGGC-3') targeting 16S rRNA of *S. symbiotica*. Insect tissues were stained  
255 with SYTOX Green. Samples (between 1 to 6 per colony) were whole mounted and observed under a  
256 Zeiss LSM 710 confocal microscope. Negative controls consisted of aphids not infected with *S.*  
257 *symbiotica* and stained with the two probes or infected aphids with no-probe staining. Positive controls  
258 comprised of artificially and naturally infected aphids.

259

## 260 **Statistical analyses**

261 We analyzed whether the proportion of aphids harboring *S. symbiotica* differs according to their host  
262 plant range, as carry out in (Henry et al. 2015): specialized (feeding on a single plant species or group  
263 of closely related species, N=13), restricted (feeding on a single plant family, N=91), polyphagous  
264 (feeding on various plant families, N=105), or obligatory host-plant alternating (N=31). The presence  
265 of *S. symbiotica* in aphids was analyzed using generalized linear models (GLM) with a binomial error  
266 structure and a logit-link function, and the degree of plant specialization by aphids was the explanatory  
267 variable. We also tested if the proportion of aphids infected by *S. symbiotica* differs in populations  
268 collected from different plant species, using Pearson's Chi-square statistic. Aphids on plant species  
269 from which we had less than five collection, and where *S. symbiotica* symbiont infected < 2% of the  
270 individuals on a plant, were excluded from the analysis as recommended in (Henry et al. 2015). We  
271 also examined the effect of the temperature (mean daily and maximum daily) on the proportion of  
272 aphids harboring *S. symbiotica*. We tested if *S. symbiotica* infection was influenced by high seasonal

273 temperatures, because this symbiont is known to protect its host from heat shock, especially aphids  
274 collected from arid regions (Russell and Moran 2006; Henry et al. 2013). The presence of *S. symbiotica*  
275 in aphids was analyzed on pooled data using generalized linear models (GLM) with a binomial error  
276 structure and a logit-link function, and the temperature was the explanatory variable. The relationship  
277 between mean daily temperatures or maximum daily temperatures and the proportion of aphids  
278 harboring *S. symbiotica* was tested on pooled data using non-parametric Spearman's correlation  
279 coefficients. We also analyzed if the proportion of tending ants, associated other insects and host plants  
280 harboring *S. symbiotica* were correlated with the infection status of aphid colonies. The presence of *S.*  
281 *symbiotica* in these different samples was analyzed using generalized linear models (GLM) with a  
282 binomial error structure and a logit-link function. The infection status of the aphid colonies was the  
283 explanatory variable and for the associated insects, the insect feeding specialization (parasitoids,  
284 phytophagous or predators) was also one explanatory variable. Statistical analyses were performed  
285 using the software R version 3.5.3 (R Development Core team, 2019), using the *Grapher* package.

286

## 287 **RESULTS**

### 288 **Distribution of *S. symbiotica* in natural aphid population**

289 The presence of *S. symbiotica* was examined in 250 aphid colonies from 58 species of the Aphididae  
290 family (Table S1). These species were mostly part of the Macrosiphini (31 species) and Aphidini (23  
291 species) tribes belonging to the Aphidinae subfamily (Table S1). Other species were members of the  
292 subfamilies Chaitophorinae (2 species) and Calaphidinae (2 species) (Table S1). The tribe Aphidini  
293 was the most collected group with 121 colonies belonging to 19 species of the genus *Aphis* (Table 1).  
294 Among the 250 colonies, 51 displayed a positive infection to *S. symbiotica* (20%), belonging to 22  
295 aphid species (38%) (Table 1 and Table S1). Within each infected aphid genus, the infection  
296 prevalence ranged from 13 to 100% (Table 1). The infection rate of *S. symbiotica* in *Aphis*, which is  
297 the most represented group in our sampling with 121 collected colonies, reached 29% (35/121) and

298 69% of infected aphid colonies belonged to the genus *Aphis* (35/51) (Table 1). More precisely, 27%  
299 (22/82) of *Aphis fabae* colonies, which is the most represented species of the genus *Aphis*, were found  
300 to be infected (Table S1). We also found a high infection rate of *S. symbiotica* in the genera  
301 *Macrosiphum* (4/5), *Capitophorus* (1/1) and *Periphyllus* (1/1) (Table 1). In contrast, we observed that  
302 in the genera *Uroleucon* and *Hyperomyzus*, the infection rate was zero (0/49 and 0/10, respectively,  
303 Table 1).

304

### 305 **Environmental and ecological factors influencing *S. symbiotica* prevalence**

306 We showed that among the 45 host plant genera collected (all containing aphids), 15 were associated  
307 with infected aphids (33%, Table 2). Of the 37 plants associated with infected aphids (all genera  
308 included), 7 were members of the genus *Cirsium* (18%) (Table 2). We asked whether the degree of  
309 plant specialization by aphids was associated with *S. symbiotica* infection in aphids. We found no  
310 significant differences in the proportion of aphids harboring *S. symbiotica* according to their degree of  
311 plant specialization (GLM,  $df = 3$ ,  $\chi^2 = 6.35$ ,  $p = 0.096$ , Figure S1). We also analyzed whether the  
312 infection of aphids with *S. symbiotica* that feed on multiple host plants was correlated with the species  
313 of plant on which they were collected. Sufficient data for analysis were available only for *A. fabae* that  
314 feed on different host plants (*Cirsium arvense*, *Cirsium vulgare*, *Daucus carota*, *Heraclum*  
315 *sphondylium*, *Rumex obtusifolium*, and *Sonchus asper*). We found that there were no significant  
316 differences in the proportion of *A. fabae* harboring *S. symbiotica* collected from different plants ( $N=49$ ,  
317  $df = 5$ ,  $\chi^2 = 3.59$ ,  $p = 0.61$ ). The distribution of *S. symbiotica* in this sampling is uniform across  
318 collections of *A. fabae* feeding on different plant species.

319 During the sampling in Belgium from May through August 2018, the mean daily temperatures  
320 ranged from 12.9 °C to 25.8 °C and that maximum daily temperatures ranged from 15.9 °C to 32.9 °C  
321 (Table S1). To test the impact of temperature on *S. symbiotica* prevalence, we focused on the data  
322 sampled in July and August when most samples were collected (Table S1). During these months, the

323 mean daily temperatures ranged from 19.5 °C to 25.8 °C and the maximum daily temperatures ranged  
324 from 22.9 °C to 32.9 °C (Table S1). To perform analyzes, temperature data were pooled into 6 balanced  
325 categories each (Table S1). We showed that *S. symbiotica* frequencies varied across Belgium aphid  
326 populations exposed to varying summer temperatures (Figure 1). We found that the proportion of  
327 aphids harboring *S. symbiotica* was significantly different between mean daily temperatures (GLM, df  
328 = 1,  $\chi^2 = 2.53$ ,  $p = 0.011$ ) and maximum daily temperatures in July and August (GLM, df = 1,  $\chi^2 = 2.08$ ,  
329  $p = 0.038$ ) (Figure 1A-B). We also showed a significant positive correlation between the proportion of  
330 aphids harboring *S. symbiotica* and the maximum daily temperatures (Spearman's  $r_s = 1$ ,  $p = 0.017$ ,  
331 Figure 1B). *S. symbiotica* frequency in aphid populations was thus significantly higher when  
332 temperatures were higher at time of collection, ranging from 7% at 23 °C to 31% at 30 °C.

333

#### 334 **Distribution of *S. symbiotica* in insect populations associated with aphid colonies**

335 Other insects associated with aphid colonies were also collected to examine the presence of similar *S.*  
336 *symbiotica* strains in the trophic systems. Among 203 insects composed of 52 species, 25 displayed a  
337 positive infection to *S. symbiotica* (12%) (Table 3).

338 Ants were the most frequent insects found in aphid colonies and were represented by 10  
339 different species (Table S1). Among the 98 tending ant samples, 10 exhibited a positive infection with  
340 *S. symbiotica*, representing an infection rate of about 10% (Table 3). These infected ants belonged to  
341 *Lasius niger*, *Linepithema humile* and *Myrmica rubra* species, with *L. niger* being the most represented  
342 species (7/10) (Table S1). We found that the proportion of tending ants harboring *S. symbiotica* was  
343 significantly higher when collected in infected aphid colonies (N = 8/27) compared to uninfected  
344 colonies (N = 2/71) (GLM, df = 1,  $\chi^2 = 13.55$ ,  $p < 0.001$ , Figure 2A).

345 Among the 15 bug individuals representing 10 species, two (*Dictyla humuli* and *Coreus*  
346 *marginatus*) were infected with *S. symbiotica* (Table S1). Twenty-two ladybugs were collected (larvae  
347 and adults), belonging to 6 species, and two adults were positive to *S. symbiotica* (*Harmonia axyridis*

348 and *Coccinella septempunctata*; Table S1). Nineteen adult parasitoids were also found in aphid  
349 colonies, mainly collected when laying eggs into aphids (Table S1). Three individuals of three species  
350 (*Aphidius funebris*, *Lysiphlebus fabarum* and *Lysiphlebus hirticornis*) showed a positive infection  
351 (Table S1). These three infected individuals were not sampled from the infected aphid colonies. Of the  
352 34 hoverfly larvae that were sampled, 4 were infected with *S. symbiotica* (*Episyrphus balteatus* and  
353 *Scaeva pyrastris*) (Table S1). Two aphid midge larvae (*Aphidoletes aphidimyza*) were infected out of  
354 7, and one moth larva was infected out of 6 (*Eupithecia trisignaria*, Table S1). Moreover, one fly larva  
355 was collected and was positive for *S. symbiotica* (*Chamaemyiidae* sp.) whereas the only lacewing larva  
356 collected was not positive (Table 3 and Table S1). We found that the proportion of these associated  
357 insects harboring *S. symbiotica* was significantly higher when collected from infected aphid colonies  
358 (N = 7/11) compared to uninfected colonies (N = 7/90) (GLM, df = 1,  $\chi^2 = 19.86$ ,  $p < 0.001$ , Figure  
359 2C). We also examine if the insect feeding specialization (parasitoids, polyphagous or predators) can  
360 influence its symbiotic infection. We found that the feeding specialization did not significantly affect  
361 the proportion of these insects harboring *S. symbiotica* (GLM (*S. symbiotica*), df = 2,  $\chi^2 = 5.2$ ,  $p =$   
362 0.074).

### 363 364 **Distribution of *S. symbiotica* in the natural aphid environment**

365 To examine the presence of *S. symbiotica* in the surrounding environment of aphids, host plant  
366 associated with aphid colonies were collected. Among the 161 plant samples (11 leaves and 150 stems)  
367 collected from 52 plant species, 14 were positive for *S. symbiotica* (about 9%), belonging to 12 plant  
368 species (23%; Table S1). The genera *Sonchus* (N=32) and *Cirsium* (N=26) were the most collected  
369 groups (Table 2). The latter exhibited the highest infection rate with 29% of infection (4/14), followed  
370 by plants of the genus *Rumex* with 14% of infection (2/14, Table 2). We showed that among the 14  
371 positive plant samples, only 6 were associated with positive aphid colonies (belonging to the genus  
372 *Aphis*) (Table 2). However, we found that the proportion of plants harboring *S. symbiotica* was



373 significantly higher when associated with infected aphid colonies (N = 6/27) compared to uninfected  
374 colonies (N =8/132) (GLM, df = 1,  $\chi^2 = 5.8$ , p = 0.016, Figure 2B).

375

### 376 **Tissue tropism of *S. symbiotica* in insects**

377 All insect samples that showed a positive infection to *S. symbiotica* were observed, using whole-mount  
378 fluorescence *in situ* hybridization. A total of 21 aphid colonies have been examined and observations  
379 revealed the existence of different patterns: 1) presence of *S. symbiotica* in the digestive tract, 2) in the  
380 sheath cells, and 3) in the secondary bacteriocytes (Figure 3).

381 Gut-associated *S. symbiotica* were found either colonizing in the midgut or into the whole gut  
382 (Figure 3A-D). The digestive tract is localized in the middle of the aphid body between the primary  
383 bacteriocytes hosting the obligate symbiont *B. aphidicola* and is composed of multiple loops (Pons et  
384 al. 2019a). Eleven aphid colonies observed exhibited an infection in the gut (Table S1). Aphids that  
385 exhibited this pattern belonged to *Aphis* sp. (mostly *A. fabae*), except one *Capitophorus elaeagni*  
386 individual. Infection of sheath cells pattern was also found in two colonies of *Macrosiphum* species  
387 (Table S1). In this case, the symbionts were located around primary bacteriocytes enclosing *B.*  
388 *aphidicola* (Figure 3E). *S. symbiotica* was also found in secondary bacteriocytes flanking the primary  
389 bacteriocytes containing *B. aphidicola* (Figure 3F-H). This pattern was observed in 8 aphid colonies  
390 belonging to 4 aphid species (*Macrosiphoniella millefolii*, *Periphyllus testudinaceus*, *Macrosiphum*  
391 *mordvilkoii*, and *A. fabae*, Table S1).

392 Regarding insects associated to aphid colonies, *S. symbiotica* has already been detected among  
393 ants, in the proventriculus, a specialized organ involved in food filtration (Renoz et al. 2018). Here,  
394 only one observed hoverfly larva showed an infection to *S. symbiotica* in the prothorax, at the  
395 beginning of the digestive tract (Figure 4). Images clearly suggest that *S. symbiotica* is accumulate into  
396 the tentorial bar, in the junction of the pump chamber with the foregut, near the true mouth (Figure 4).

397



## 398 **Diversity of *S. symbiotica* infections**

399 Bacterial sequences of the *accD*, *gyrB*, *murE*, and *recJ* genes were taken from all 90 positive samples  
400 for *S. symbiotica* infection. Sequences were easily readable in 54 samples and for analyses, we  
401 excluded the remaining samples that had either polymorphic sequences, sequences that were difficult  
402 to read, or missing sequences (Table S2, Supplementary Information).

403 The phylogenetic relationship between these 54 *S. symbiotica* strains and other already  
404 described *S. symbiotica* strains was estimated using sequences obtained in this study, as well as  
405 sequences available in Genbank (Table S2). We also used *S. proteamaculans* 568, as outgroup. We  
406 found that the phylogeny of the *S. symbiotica* strains is strongly structured by the taxonomic identity  
407 of their host and the phylogenetic analyses established the existence of four distinct clades (Figure 5).  
408 Co-obligate *S. symbiotica* strains from *C. cedri* (SCc), *C. formacula* (SCf), *C. strobili* (SCs), and *T.*  
409 *salignus* (STs Pazieg) aphids that were localized in secondary bacteriocytes form clade B (Burke and  
410 Moran 2011; Manzano-Marín and Latorre 2014; Manzano-Marín et al. 2017; Meseguer et al. 2017).  
411 The strains composing this clade are co-obligate symbionts of aphids and exhibit a long-term co-  
412 evolutionary history with their hosts. The clade A is composed of *S. symbiotica* strains that are  
413 generally considered as aphid facultative endosymbionts or recent co-obligates. This clade includes  
414 strains found in *A. pisum*: SAp Tucson strain localized in sheath cells (Burke and Moran 2011;  
415 Manzano-Marín et al. 2017) and SIS strain residing in secondary bacteriocytes and sheath cells (Nikoh  
416 et al. 2019). It also contains strains found in *C. tujaefilina* (SCt VLC) (Burke and Moran 2011;  
417 Manzano-Marín et al. 2017) and *A. urticata* (AURT-53S) that are localized in secondary bacteriocytes,  
418 and in *M. carnosum* (MCAR-56S) localized in sheath cells (Monnin et al. 2020). It is also composed  
419 of strains found in *M. rosae* and *M. mordvilkoii* and localized in secondary bacteriocytes or sheath cells  
420 (Figure 3). The clade D forms a large monophyletic clade consisting of, among others, strains from  
421 aphids of the genus *Aphis*, and strains from the aphid species *M. absintii*, *M. millefolii*, *B. cardui* and  
422 *T. aurantia*. This clade also includes *S. symbiotica* strains from the host plants and insects associated

423 with the aphid colonies. Interestingly, these strains fall into the same clade as *S. symbiotica* strains  
424 associated with aphids sampled in the corresponding colony. Also included in this clade, the three  
425 strains previously isolated (SCWBI-2.3<sup>T</sup>, SApa 8-A1, SAf 24.1) (Sabri et al. 2011; Grigorescu et al.  
426 2017) and the strains previously detected in the aphid gut (FR65, FR28, FR35 and VP6; Table S4)  
427 (Renoz et al. 2018). All *S. symbiotica* strains localized in the aphid gut are grouped within this clade.  
428 However, some strains localized in secondary bacteriocytes (ID 33, 380, 369,197; Figure 3) are also  
429 included in this clade. We also observed a polytomy with a group containing strains from an aphid, an  
430 ant and a bug sampled in the same colony and another group containing the cultivable strain (SCWBI-  
431 2.3<sup>T</sup>) and two strains from the aphid gut. The clade C includes *S. symbiotica* strains associated with  
432 aphids of the genus *Periphellus* and a strain associated with *U. sonchi*. These strains are considered as  
433 nutritional co-obligate (Monnin et al. 2020). In *P. testudinaceus*, *S. symbiotica* was clearly localized  
434 in bacteriocytes (Figure 3).

435

## 436 **DISCUSSION**

437 In this study, we investigated the presence and the distribution of *S. symbiotica* in wild aphid  
438 populations, as well as in the different compartments of the surrounding environment of these sap-  
439 feeding insects. Our results provide a comprehensive picture of the ubiquity of *S. symbiotica* in the  
440 natural aphid environment including ants, predators, parasitoids and plants. They first confirm that *S.*  
441 *symbiotica* exhibit different patterns of infection in aphids and that certain strains naturally transit  
442 through the digestive tract of these insects (Renoz et al. 2019). Our findings also demonstrate that the  
443 distribution of *S. symbiotica* is not limited to aphids but extends to other organisms that may interact  
444 with them and host plants. Finally, our results suggest that some *S. symbiotica* strains may be able to  
445 jump from one host to another, including plants, and could undergo frequent horizontal transfers. In  
446 the light of these results, we discuss the multi-faceted nature of *S. symbiotica* and the evolutionary  
447 scenarios of symbiont acquisitions in insects.

448 In a previous study, we experimentally demonstrated that a strain of *S. symbiotica* previously  
449 isolated from the aphid *Aphis fabae* (Sabri et al 2014) was capable to invade phloem sap of *Vicia faba*  
450 and that infected plants can then serve as reservoirs for horizontal transmission of *S. symbiotica* in  
451 aphids (Pons et al. 2019). Our field study suggests that *S. symbiotica* can naturally reside in plants. To  
452 our knowledge, it is the first time that this symbiont species was found in plants collected directly on  
453 the field. The presence of *S. symbiotica* in plants addresses major ecological issues including 1) the  
454 role of plants in the dissemination in insect populations of bacterial candidates, which may serve as  
455 environmental progenitors for the establishment of new mutualisms, and 2) the nature of the interaction  
456 that certain *S. symbiotica* strains have with plants. When *S. symbiotica* were detected in both aphids  
457 and the corresponding host plant, they are found in the same phylogenetic clades, indicating a close  
458 phylogenetic proximity whose suggests horizontal transfers between aphids and plants. The hypothesis  
459 of the existence of such transfers is strengthened by the fact that we found host plants harboring *S.*  
460 *symbiotica* significantly more frequently when aphids were also found infected on that plant. However,  
461 in some cases, we did not detect *S. symbiotica* in aphids when the host plant was positive. This may  
462 be because either aphids sampled had not yet been infected, we missed the infection, or some strains  
463 only infect plants and fail to infect aphids. Our results thus raise questions about the nature of the  
464 interaction between *S. symbiotica* and plants. The *Serratia* genus includes bacterial members that have  
465 the propency to evolve in diverse environments including water, soil, plants, humans and invertebrates  
466 (Grimont and Grimont 2006), and many *Serratia* species can establish mutualistic or parasitic  
467 partnerships with plants (Petersen and Tisa 2013). In the context of our study, one assumption is that  
468 certain *S. symbiotica* strains are associated with plants, either in commensalistic associations, or in  
469 more intimate associations (pathogenic or mutualistic). Our previous study suggests that *S. symbiotica*  
470 can provide benefits to the infected plants, and that, in exchange, plants provide a suitable ecological  
471 niche mostly composed of sugar for *S. symbiotica* (Pons et al. 2019b). Ongoing studies should provide  
472 a better understanding of the nature of the interaction between certain bacterial strains and plants.

473 Another assumption is that *S. symbiotica* strains residing in plants could serve as an environmental  
474 symbiont pool from which new intimate associations are formed. This is supported by phylogenetic  
475 analyses showing that the *Cinara*-associated *Erwinia* co-obligate symbionts initially derived from  
476 plant associates (Manzano-Marín et al. 2020). Our field study thus suggests that *S. symbiotica* in aphids  
477 evolved from bacteria that originally inhabited plants, and highlights this bacterium as a valuable  
478 model for understanding how bacteria develop cross-kingdom host jumps and exploit multiple hosts  
479 before becoming, under still unclear circumstances, long-term mutualists in insects.

480 The broad sampling in our study highlights the great diversity of *S. symbiotica* strains in aphids  
481 with different tissue tropisms. We confirms the existence of strains that reside in the aphid gut,  
482 particularly in species of the genus *Aphis*, as already previously reported (Renoz et al. 2018). The  
483 existence of these strains that reside naturally within insect gut suggest that the feeding behavior is a  
484 likely source of new acquisition for these strains. Several studies support the idea that bacteria present  
485 in the aphid's diet are a source of endosymbiotic bacteria (Harada et al. 1996; Manzano-Marín et al.  
486 2020). Our results support this hypothesis and the following scenario: 1) acquisition of bacterial  
487 progenitors originally inhabiting the plant, 2) transition through the insect digestive tract, an  
488 intermediate step before, and 3) the possible establishment of more intimate associations. Experimental  
489 works have demonstrated that gut strains are unable to establish persistent maternal transmission (Pons  
490 et al. 2019, Perreau et al. 2020). A strict vertical transmission is, however, not always possible and in  
491 fact, not always necessary for the transmission of some gut symbionts. One of the most remarkable  
492 cases is the relationship between bean bug *Riptortus pedestris* and the beneficial gut symbiont  
493 *Burkholderia*. For successful inoculation of the next generation, the offspring must feed on inoculated  
494 or contaminated material from the adult's gut flora, and the symbiont must be environmentally re-  
495 acquired with each generation through nymph feeding (Kikuchi et al. 2007; Kikuchi and Yumoto  
496 2013). In the context of the interaction between aphid and these gut-associated *S. symbiotica*, a  
497 permanent environmental source of contamination is required to maintain the infection across aphid

498 generations (Pons et al. 2019a). It is possible that infected plants provide such a source. These gut-  
499 associated strains were found to be grouped in a common phylogenetic clade (clade D), as previously  
500 shown in (Renoz et al. 2018). At the exception of the oleaster aphid *Capitophorus elaeagni*, aphid  
501 species harboring gut-associated *S. symbiotica* were members of the genus *Aphis*. If experimental  
502 studies have previously highlighted the moderate pathogenic effects of gut-associated *S. symbiotica*  
503 (CWBI-2.3<sup>T</sup>) (Pons et al. 2019, Perrau et al. 2020), their involvement in mutualistic associations with  
504 their insect host cannot be excluded. A recent study showed that the *S. symbiotica* strain (CWBI-2.3<sup>T</sup>)  
505 infecting the aphid gut is capable to produce proteases including metalloproteases, which may facilitate  
506 the digestion of plant proteins by helping to suppress plant defense (Skaljac et al. 2019). In light of  
507 this, it is possible that these gut-associated *S. symbiotica* contribute to improve the assimilation by  
508 aphids of some types of phloem sap or the elimination of toxins produced by host plants, allowing the  
509 aphid adaptation to feed on certain plants.

510 Our results offer the opportunity to investigate the different patterns of tissue tropism exhibited  
511 by *S. symbiotica* in aphids and beyond. It was previously established that intracellular *S. symbiotica*  
512 strains could be housed either in secondary bacteriocytes and in sheath cells in the case of facultative  
513 strains (Koga R. et al. 2003; Moran et al. 2005; Koga et al. 2012) and solely in bacteriocytes (subfamily  
514 Aphidinae subfamily) in the case of nutritional co-obligate strains (subfamilies Lachninae and  
515 Chaitophorinae subfamilies) (Manzano-Marín et al. 2016, 2017; Monnin et al. 2020). In parallel to  
516 these infection patterns, the aphid gut that evolve exclusively, to our knowledge, at the extracellular  
517 level (Renoz et al. 2018; Pons et al. 2019a; Perreau et al. 2020; Elston et al. 2021). All of these patterns  
518 could be observed from the sampling we carried out in this study. Intracellular *S. symbiotica* strains  
519 exclusively compartmentalized into sheath cells surrounding the primary bacteriocytes hosting *B.*  
520 *aphidicola* have only been observed in individuals belonging to *Macrosiphum* species. *S. symbiotica*  
521 was also observed in secondary bacteriocytes in different aphid species, including *Periphyllus*  
522 *testudinaceus*, *Macrosiphoniella millefolii*, *Aphis fabae*, *Macrosiphum mordvilkoii* and *Macrosiphum*

523 *rosae*. So far, this tissue tropism of *S. symbiotica* has mostly been reported in aphids where the  
524 symbiont is a co-obligate nutritional partner (Manzano-Marín et al. 2016, 2017; Monnin et al. 2020).  
525 In our study, this is the case of *Periphyllus testudinaceus*, a member of the subfamily Chaitophorinae  
526 where *S. symbiotica* has evolved as a nutritional co-obligate partner (Monnin et al. 2020). This tissue  
527 tropism pattern has also been described in *A. pisum* but mainly after an artificial infection of the  
528 hemolymph (Fukatsu et al. 2000; Koga R. et al. 2003) and in *Aphis urticata* (Monnin et al. 2020). Our  
529 observations demonstrate that a specific microscopic approach is definitively needed to clarify the  
530 nature of the associations in which bacteria and insects are involved because the topology of the  
531 phylogenetic tree does not allow inferring the infection pattern displayed by *S. symbiotica*: the clade  
532 D remains diverse and includes strains that exhibit different tissue tropism patterns, suggesting a lack  
533 of resolution. It would thus be necessary to target additional housekeeping genes to increase the  
534 resolution of the phylogentic analyses, discriminate differences within clade D, and fully resolve the  
535 phylogeny of *S. symbiotica*.

536 While horizontal symbiont transfer is known to occur in the field, the rate at which it occurs is  
537 still unknown (Russell et al. 2003; Darby and Douglas 2003; Gehrler and Vorburger 2012; Jousselin et  
538 al. 2013; Henry et al. 2013; Guyomar et al. 2018). Here, we demonstrated that *S. symbiotica* infection  
539 can occur in non-aphid insect species found in close proximity to aphid colonies and involved in  
540 trophic relationships with them (12% of the screened insects were found positive to *S. symbiotica*).  
541 We found that these insects were significantly more likely to harbor *S. symbiotica* when aphid colonies  
542 were infected by the bacterium. In addition, we showed that *S. symbiotica* strains associated with the  
543 non-aphid insects were in the same clades as strains found in aphids of the corresponding sampled  
544 colonies. These results suggest that horizontal transfers of *S. symbiotica* can occur within natural insect  
545 communities and that *S. symbiotica* infections extend beyond aphids. This can be an adaptive  
546 characteristic allowing a wide dispersion of a fairly generalist bacterium although dependent on sugar  
547 rich diet. Ant-tending is a possible route of transmission of symbiotic bacteria from aphids to ants and

548 vice versa, especially because ants feed on honeydew that can be infected by *S. symbiotica* (Pons et al  
549 2019). With 10% of the sampled ants found infected by *S. symbiotica*, our results confirmed previous  
550 studies having reported the presence of the bacterium in these social insects (Sirvio and Pamilo 2010,  
551 Het et al. 2014, Renoz et al. 2019). This is an important issue because, even if *S. symbiotica* is only an  
552 occasional passenger in ants, the social and feeding behavior of these insects could promote the  
553 dissemination of certain *S. symbiotica* strains in the aphid colonies and increase the environmental  
554 symbiont pool from which potential new associations could originate. Another possible route of  
555 symbiont transmission from aphids to non-aphid insects is predation by entomophagous insects such  
556 as ladybugs, hoverflies, aphid midges and fly larvae. We showed that *S. symbiotica* infect these insects  
557 and we were able to localize the infection at the beginning of the digestive tract of a hoverfly larvae.  
558 This suggest that *S. symbiotica* can transit from one trophic level to another through predation and  
559 initiate an infection in non-aphid species. Further studies will be needed to determine the impact of *S.*  
560 *symbiotica* in these new hosts and the extent to which more systemic and persistent infection may  
561 occur. We also found that parasitoids could be infected, but in this case, the tissue tropism of *S.*  
562 *symbiotica* was not studied due to a lack of insect material to perform all analyses. A previous study  
563 showed the role of parasitoids as vectors of facultative bacterial symbionts in aphids (Gehrer and  
564 Vorburger 2012). These insects could promote the emergence of symbioses because their mode of  
565 parasitism could allow symbionts to have a direct access to the aphid hemolymph where the cells  
566 specialized in symbiont sheltering are found. Ongoing studies should clarify the nature of this  
567 interaction at the developmental level, but also at the ecological level with the cascading effects that  
568 *S. symbiotica* infections could induce on parasitoid communities. Indeed, *S. symbiotica*, whether  
569 facultative intracellular or gut-associated strains, can severely hamper the development of parasitoids  
570 in aphids (Pons et al. 2019a). *S. symbiotica* was also detected in bugs, caterpillars and moth larvae that  
571 are sap-sucking insects or herbivores that do not directly interact with aphids but can feed on the same  
572 host plants. These results suggest, once again, that plants could be reservoir at the origin of new



573 interactions between *S. symbiotica* and insects. All these findings reveal the surprising ubiquity of *S.*  
574 *symbiotica*, with strains that are likely able to disperse through multiple insect species via horizontal  
575 transmission. Some bacterial genera show a high propensity to infect diverse hosts, including  
576 *Spiroplasma*, *Sodalis* and *Arsenophnus* symbionts (Fukatsu et al. 2001; Bressan et al. 2009; Clayton  
577 et al. 2012; Jousselin et al. 2013; Schwarz et al. 2014; Santos-Garcia et al. 2017; Ballinger et al. 2018;  
578 Masson et al. 2018). These examples stresses that putative progenitors of host-beneficial symbionts  
579 circulate throughout the trophic system, with potential consequences not only for the ecology and  
580 evolution of their primary host, but also for those of transitive hosts (Moran and Yun 2015). In the  
581 case of *S. symbiotica* (especially gut-associated strains), whether it is an established symbiont or  
582 whether a transient commensal resident in multiple insect hosts, is yet to be elucidated.

583 In our study, a total of 58 aphid species were sampled and the prevalence of *S. symbiotica*  
584 reaches 20% in aphids, which is fairly similar to what has been recorded in previous studies (Henry et  
585 al. 2015; Renoz et al. 2018). Our results confirmed the high presence of *S. symbiotica* infections in the  
586 genus *Aphis* with 29% of aphids being infected. In addition, *S. symbiotica* was identified in a  
587 significant proportion in other aphid genera, such as in *Macrosiphum sp.* and *Capitophorus sp.*, while  
588 no infection was detected in some aphid genera, such as in *Uroleuchon sp.*. The prevalence of *S.*  
589 *symbiotica* in aphid populations may depend on the aphid genus, but this assumption should be taken  
590 with caution. Indeed, one study reported no general effect of aphid phylogeny on the symbiont  
591 presence (Henry et al. 2015), although another study, which considered all aphid symbionts, suggests  
592 a genus-specific effect (Zytynska and Weisser 2016). The nature of the interaction between insects and  
593 symbiotic bacteria can also depend on abiotic and biotic factors including the presence of predators  
594 and parasitoids, the host plant and climatic factors (Henry et al. 2013; Oliver et al. 2014; Zytynska and  
595 Weisser 2016; McLean Ailsa H. C. et al. 2016). Our results suggest that the incidence of *S. symbiotica*  
596 infection increase with higher frequencies at higher seasonal temperatures. Some experimental studies  
597 have already shown that some strains of *S. symbiotica* can provide a protection against heat shock in



598 aphids (Montllor et al. 2002; Russell and Moran 2006; Burke et al. 2009). These protective effects  
599 associated with *S. symbiotica* are also supported by the high prevalence of *S. symbiotica* reported in  
600 arid regions (Henry et al. 2013). All these findings underlined a possible link between temperature  
601 seasonality and the prevalence of *S. symbiotica* in aphid populations. The multifaceted nature of *S.*  
602 *symbiotica* must, however, be considered (a diversity that includes strains ranging from pathogens to  
603 strict mutualists). Previous studies reported the influence of host plants on the presence of facultative  
604 symbionts in aphids (Tsuchida et al. 2004; Brady and White 2013; Guidolin and Côté 2017). In our  
605 sampling, the distribution of *S. symbiotica* is, however, uniform across collections of *A. fabae*  
606 regardless of host plants. More generally, we showed that the proportion of aphids (all species  
607 included) harboring *S. symbiotica* is not different according to their degree of plant specialization. This  
608 result is not consistent with another study, which showed that *S. symbiotica* is most commonly found  
609 in specialist aphids (Henry et al. 2015). The distribution of *S. symbiotica* in natural aphid populations  
610 thus seems difficult to explain by considering only one or some factors. In some cases, it appeared to  
611 be random and in other cases as a consequence of selection acting on specific associations.

612 To conclude, our study provides a comprehensive picture of the ubiquity of *S. symbiotica* in  
613 nature. It is now established that intracellular host-dependent symbionts of insects can evolve from  
614 originally free-living bacterial lineages (Husník et al. 2011; Clayton et al. 2012; Manzano-Marín et al.  
615 2020). Genetic analyses indicate that these intimate relationships between insects and bacteria can  
616 evolve in a very dynamic fashion involving the recruitment of new bacterial partners and the repeated  
617 replacement of pre-existing intracellular symbionts (Koga and Moran 2014; Husník and McCutcheon  
618 2016; Meseguer et al. 2017; Monnin et al. 2020; Mao and Bennett 2020). Symbiont switching is an  
619 important evolutionary mechanism, which is not limited to insects (e.g., in reef organisms such as  
620 corals and sponges) (Webster and Reusch 2017), and by which maladaptive symbionts are replaced by  
621 new functional ones (Sudakaran et al. 2017). The presence of *S. symbiotica* at different trophic levels  
622 suggests the existence of an environmental pool of bacteria from which new intimate partnerships with

623 insects may emerge. We hypothesize that the *S. symbiotica* diversity includes strains that exhibit a  
624 generalist lifestyle, still capable to develop cross-kingdom host jumps, before, under specific  
625 conditions, potentially transiting to a more specialized, and host-dependent lifestyle. A key aspect is  
626 understanding the factors that favor such a transition, in particular the conditions that promote the  
627 passage from the digestive tract to the hemolymph, a required step for the adoption of an intracellular  
628 life and for access to vertical transmission. Another burning question concerns the specific  
629 characteristics possessed by certain bacterial genera and species (e.g., members of the genera *Sodalis*,  
630 *Arsenophonus*, and members of *S. symbiotica*) to regularly engage in stable alliances with insects. The  
631 ecological versatility of *S. symbiotica* offers exciting avenues for answering these questions and  
632 refining our understanding of the evolution of bacterial mutualism.

633

#### 634 **ACKNOWLEDGMENTS**

635 We thank Charlotte Tinel, Aurélien Kaiser and Anastase Harelimana for some samples collection. We  
636 also thank Alain Vanderpoorten (University of Liège) for his help in phylogenetic analyses. This work  
637 was supported by the Fonds de la Recherche Scientifique (FNRS) through a Fonds pour la Formation  
638 à la Recherche dans l'Industrie et dans l'Agriculture (FRIA). This paper is publication BRC 348 of the  
639 Biodiversity Research Center (Université catholique de Louvain).

640

#### 641 **REFERENCES**

- 642 Aljanabi SM, Martinez I (1997) Universal and rapid salt-extraction of high quality genomic DNA for PCR-based  
643 techniques. *Nucleic Acids Res* 25:4692–4693. <https://doi.org/10.1093/nar/25.22.4692>
- 644 Ballinger MJ, Moore LD, Perlman SJ (2018) Evolution and Diversity of Inherited Spiroplasma Symbionts in  
645 *Myrmica* Ants. *Appl Env Microbiol* 84:e02299-17. <https://doi.org/10.1128/AEM.02299-17>
- 646 Baumann P, Moran NA, Baumann LC (2013) Bacteriocyte-Associated Endosymbionts of Insects. In:  
647 Rosenberg E, DeLong EF, Lory S, et al. (eds) *The Prokaryotes: Prokaryotic Biology and Symbiotic*  
648 *Associations*. Springer Berlin Heidelberg, Berlin, Heidelberg, pp 465–496
- 649 Brady CM, White JA (2013) Cowpea aphid (*Aphis craccivora*) associated with different host plants has  
650 different facultative endosymbionts. *Ecol Entomol* 38:433–437. <https://doi.org/10.1111/een.12020>

- 651 Bressan A, Sémétey O, Arneodo J, et al (2009) Vector Transmission of a Plant-Pathogenic Bacterium in the  
652 Arsenophonus Clade Sharing Ecological Traits with Facultative Insect Endosymbionts.  
653 *Phytopathology* 99:1289–1296. <https://doi.org/10.1094/PHYTO-99-11-1289>
- 654 Bright M, Bulgheresi S (2010) A complex journey: transmission of microbial symbionts. *Nat Rev Microbiol*  
655 8:218–230. <https://doi.org/10.1038/nrmicro2262>
- 656 Burke G, Fiehn O, Moran N (2009) Effects of facultative symbionts and heat stress on the metabolome of pea  
657 aphids. *ISME J* 4:242–252. <https://doi.org/10.1038/ismej.2009.114>
- 658 Burke GR, Moran NA (2011) Massive Genomic Decay in *Serratia symbiotica*, a Recently Evolved Symbiont of  
659 Aphids. *Genome Biol Evol* 3:195–208. <https://doi.org/10.1093/gbe/evr002>
- 660 Caspi-Fluger Ayelet, Inbar Moshe, Mozes-Daube Netta, et al (2012) Horizontal transmission of the insect  
661 symbiont *Rickettsia* is plant-mediated. *Proc R Soc B Biol Sci* 279:1791–1796.  
662 <https://doi.org/10.1098/rspb.2011.2095>
- 663 Castresana J (2000) Selection of Conserved Blocks from Multiple Alignments for Their Use in Phylogenetic  
664 Analysis. *Mol Biol Evol* 17:540–552. <https://doi.org/10.1093/oxfordjournals.molbev.a026334>
- 665 Chari A, Oakeson KF, Enomoto S, et al (2015) Phenotypic characterization of *Sodalis praecaptivus* sp. nov., a  
666 close non-insect-associated member of the *Sodalis*-allied lineage of insect endosymbionts. *Int J Syst*  
667 *Evol Microbiol* 65:1400–1405. <https://doi.org/10.1099/ij.s.0.000091>
- 668 Chong RA, Moran NA (2018) Evolutionary loss and replacement of *Buchnera*, the obligate endosymbiont of  
669 aphids. *ISME J* 12:898. <https://doi.org/10.1038/s41396-017-0024-6>
- 670 Clayton AL, Oakeson KF, Gutin M, et al (2012) A Novel Human-Infection-Derived Bacterium Provides Insights  
671 into the Evolutionary Origins of Mutualistic Insect–Bacterial Symbioses. *PLOS Genet* 8:e1002990.  
672 <https://doi.org/10.1371/journal.pgen.1002990>
- 673 D’acier AC, Cruaud, Artige (2014) DNA Barcoding and the Associated PhylAphidB@se Website for the  
674 Identification of European Aphids (Insecta: Hemiptera: Aphididae).  
675 <https://journals.plos.org/plosone/article?id=10.1371/journal.pone.0097620>. Accessed 12 Apr 2019
- 676 Darby AC, Douglas AE (2003) Elucidation of the Transmission Patterns of an Insect-Borne Bacterium. *Appl*  
677 *Environ Microbiol* 69:4403–4407. <https://doi.org/10.1128/AEM.69.8.4403-4407.2003>
- 678 Douglas AE (1998) Nutritional Interactions in Insect-Microbial Symbioses: Aphids and Their Symbiotic  
679 Bacteria *Buchnera*. *Annu Rev Entomol* 43:17–37. <https://doi.org/10.1146/annurev.ento.43.1.17>
- 680 Douglas AE (2011) Lessons from Studying Insect Symbioses. *Cell Host Microbe* 10:359–367.  
681 <https://doi.org/10.1016/j.chom.2011.09.001>
- 682 Doyle J (1991) DNA Protocols for Plants. In: *Molecular Techniques in Taxonomy*. Springer, Berlin, Heidelberg,  
683 pp 283–293
- 684 Elston KM, Perreau J, Maeda GP, et al (2021) Engineering a Culturable *Serratia symbiotica* Strain for Aphid  
685 Paratransgenesis. *Appl Environ Microbiol* 87:. <https://doi.org/10.1128/AEM.02245-20>
- 686 Feldhaar H (2011) Bacterial symbionts as mediators of ecologically important traits of insect hosts. *Ecol*  
687 *Entomol* 36:533–543. <https://doi.org/10.1111/j.1365-2311.2011.01318.x>

- 688 Foray V, Grigorescu AS, Sabri A, et al (2014) Whole-Genome Sequence of *Serratia symbiotica* Strain CWBI-  
689 2.3T, a Free-Living Symbiont of the Black Bean Aphid *Aphis fabae*. *Genome Announc* 2:e00767-14.  
690 <https://doi.org/10.1128/genomeA.00767-14>
- 691 Fukatsu T, Nikoh N, Kawai R, Koga R (2000) The Secondary Endosymbiotic Bacterium of the Pea Aphid  
692 *Acyrtosiphon pisum* (Insecta: Homoptera). *Appl Environ Microbiol* 66:2748–2758.  
693 <https://doi.org/10.1128/AEM.66.7.2748-2758.2000>
- 694 Fukatsu T, Tsuchida T, Nikoh N, Koga R (2001) *Spiroplasma* Symbiont of the Pea Aphid, *Acyrtosiphon pisum*  
695 (Insecta: Homoptera). *Appl Environ Microbiol* 67:1284–1291.  
696 <https://doi.org/10.1128/AEM.67.3.1284-1291.2001>
- 697 Gehrler L, Vorburger C (2012) Parasitoids as vectors of facultative bacterial endosymbionts in aphids. *Biol Lett*  
698 *rsbl20120144*. <https://doi.org/10.1098/rsbl.2012.0144>
- 699 Gil R, Latorre A (2019) Unity Makes Strength: A Review on Mutualistic Symbiosis in Representative Insect  
700 Clades. *Life* 9:21. <https://doi.org/10.3390/life9010021>
- 701 Grigorescu AS, Renoz F, Sabri A, et al (2017) Accessing the Hidden Microbial Diversity of Aphids: an  
702 Illustration of How Culture-Dependent Methods Can Be Used to Decipher the Insect Microbiota.  
703 *Microb Ecol* 1–14. <https://doi.org/10.1007/s00248-017-1092-x>
- 704 Grimont F, Grimont PAD (2006) The Genus *Serratia*. In: Dworkin M, Falkow S, Rosenberg E, et al. (eds) *The*  
705 *Prokaryotes*. Springer New York, pp 219–244
- 706 Guidolin AS, C onsoli FL (2017) Symbiont Diversity of *Aphis* (Toxoptera) *citricidus* (Hemiptera: Aphididae) as  
707 Influenced by Host Plants. *Microb Ecol* 73:201–210. <https://doi.org/10.1007/s00248-016-0892-8>
- 708 Guo J, Hatt S, He K, et al (2017) Nine facultative endosymbionts in aphids. A review. *J Asia-Pac Entomol*.  
709 <https://doi.org/10.1016/j.aspen.2017.03.025>
- 710 Guyomar C, Legeai F, Jousset E, et al (2018) Multi-scale characterization of symbiont diversity in the pea  
711 aphid complex through metagenomic approaches. *Microbiome*.  
712 <https://microbiomejournal.biomedcentral.com/articles/10.1186/s40168-018-0562-9>. Accessed 25  
713 Nov 2019
- 714 Harada H, Ishikawa H (1993) Gut microbe of aphid closely related to its intracellular symbiont. *Biosystems*  
715 31:185–191. [https://doi.org/10.1016/0303-2647\(93\)90048-H](https://doi.org/10.1016/0303-2647(93)90048-H)
- 716 Harada H, Oyaizu H, Ishikawa H (1996) A Consideration About the Origin of Aphid Intracellular Symbiont in  
717 Connection with Gut Bacterial Flora. *J Gen Appl Microbiol* 42:17–26.  
718 <https://doi.org/10.2323/jgam.42.17>
- 719 Harada H, Oyaizu H, Kosako Y, Ishikawa H (1997) *Erwinia aphidicola*, a new species isolated from pea aphid,  
720 *Acyrtosiphon pisum*. *J Gen Appl Microbiol* 43:349–354. <https://doi.org/10.2323/jgam.43.349>
- 721 Henry LM, Maiden MCJ, Ferrari J, Godfray HCJ (2015) Insect life history and the evolution of bacterial  
722 mutualism. *Ecol Lett* 18:516–525. <https://doi.org/10.1111/ele.12425>
- 723 Henry LM, Peccoud J, Simon J-C, et al (2013) Horizontally Transmitted Symbionts and Host Colonization of  
724 Ecological Niches. *Curr Biol* 23:1713–1717. <https://doi.org/10.1016/j.cub.2013.07.029>

- 725 Heyworth ER, Ferrari J (2015) A facultative endosymbiont in aphids can provide diverse ecological benefits. *J*  
726 *Evol Biol* 28:1753–1760. <https://doi.org/10.1111/jeb.12705>
- 727 Hosokawa T, Ishii Y, Nikoh N, et al (2016) Obligate bacterial mutualists evolving from environmental bacteria  
728 in natural insect populations. *Nat Microbiol* 1:15011. <https://doi.org/10.1038/nmicrobiol.2015.11>
- 729 Husník F, Chrudimský T, Hypša V (2011) Multiple origins of endosymbiosis within the Enterobacteriaceae ( $\gamma$ -  
730 Proteobacteria): convergence of complex phylogenetic approaches. *BMC Biol* 9:87.  
731 <https://doi.org/10.1186/1741-7007-9-87>
- 732 Husnik F, McCutcheon JP (2016) Repeated replacement of an intrabacterial symbiont in the tripartite nested  
733 mealybug symbiosis. *Proc Natl Acad Sci* 113:E5416–E5424.  
734 <https://doi.org/10.1073/pnas.1603910113>
- 735 Joussetin E, Cœur d’Acier A, Vanlerberghe-Masutti F, Duron O (2013) Evolution and diversity of  
736 *Arsenophonus* endosymbionts in aphids. *Mol Ecol* 22:260–270. <https://doi.org/10.1111/mec.12092>
- 737 Kearse M, Moir R, Wilson A, et al (2012) Geneious Basic: An integrated and extendable desktop software  
738 platform for the organization and analysis of sequence data. *Bioinformatics* 28:1647–1649.  
739 <https://doi.org/10.1093/bioinformatics/bts199>
- 740 Kikuchi Y, Hosokawa T, Fukatsu T (2007) Insect-Microbe Mutualism without Vertical Transmission: a Stinkbug  
741 Acquires a Beneficial Gut Symbiont from the Environment Every Generation. *Appl Environ Microbiol*  
742 73:4308–4316. <https://doi.org/10.1128/AEM.00067-07>
- 743 Kikuchi Y, Yumoto I (2013) Efficient Colonization of the Bean Bug *Riptortus pedestris* by an Environmentally  
744 Transmitted Burkholderia Symbiont. *Appl Environ Microbiol* 79:2088–2091.  
745 <https://doi.org/10.1128/AEM.03299-12>
- 746 Koga R, Meng X-Y, Tsuchida T, Fukatsu T (2012) Cellular mechanism for selective vertical transmission of an  
747 obligate insect symbiont at the bacteriocyte–embryo interface. *Proc Natl Acad Sci* 109:E1230–E1237.  
748 <https://doi.org/10.1073/pnas.1119212109>
- 749 Koga R, Moran NA (2014) Swapping symbionts in spittlebugs: evolutionary replacement of a reduced  
750 genome symbiont. *ISME J* 8:1237–1246. <https://doi.org/10.1038/ismej.2013.235>
- 751 Koga R., Tsuchida T., Fukatsu T. (2003) Changing partners in an obligate symbiosis: a facultative  
752 endosymbiont can compensate for loss of the essential endosymbiont *Buchnera* in an aphid. *Proc R*  
753 *Soc Lond B Biol Sci* 270:2543–2550. <https://doi.org/10.1098/rspb.2003.2537>
- 754 Koga R, Tsuchida T, Fukatsu T (2009) Quenching autofluorescence of insect tissues for *in situ* detection of  
755 endosymbionts. *Appl Entomol Zool* 44:281–291. <https://doi.org/10.1303/aez.2009.281>
- 756 Lamelas A, Gosalbes MJ, Manzano-Marín A, et al (2011) *Serratia symbiotica* from the Aphid *Cinara cedri*: A  
757 Missing Link from Facultative to Obligate Insect Endosymbiont. *PLoS Genet* 7:e1002357.  
758 <https://doi.org/10.1371/journal.pgen.1002357>
- 759 Lanfear R, Calcott B, Ho SYW, Guindon S (2012) PartitionFinder: Combined Selection of Partitioning Schemes  
760 and Substitution Models for Phylogenetic Analyses. *Mol Biol Evol* 29:1695–1701.  
761 <https://doi.org/10.1093/molbev/mss020>
- 762 Latorre A, Manzano-Marín A (2017) Dissecting genome reduction and trait loss in insect endosymbionts. *Ann*  
763 *N Y Acad Sci* 1389:52–75. <https://doi.org/10.1111/nyas.13222>

- 764 Łukasik P, Guo H, Asch M van, et al (2015) Horizontal transfer of facultative endosymbionts is limited by host  
765 relatedness. *Evolution* 69:2757–2766. <https://doi.org/10.1111/evo.12767>
- 766 Manzano-Marín A, Coeur d’acier A, Clamens A-L, et al (2018) A Freeloader? The Highly Eroded Yet Large  
767 Genome of the *Serratia symbiotica* Symbiont of *Cinara strobilifera*. *Genome Biol Evol* 10:2178–2189.  
768 <https://doi.org/10.1093/gbe/evy173>
- 769 Manzano-Marín A, Latorre A (2016) Snapshots of a shrinking partner: Genome reduction in *Serratia*  
770 *symbiotica*. *Sci Rep* 6:32590. <https://doi.org/10.1038/srep32590>
- 771 Manzano-Marín A, Latorre A (2014) Settling Down: The Genome of *Serratia symbiotica* from the Aphid  
772 *Cinara tujafilina* Zooms in on the Process of Accommodation to a Cooperative Intracellular Life.  
773 *Genome Biol Evol* 6:1683–1698. <https://doi.org/10.1093/gbe/evu133>
- 774 Manzano-Marín A, Simon J-C, Latorre A (2016) Reinventing the Wheel and Making It Round Again:  
775 Evolutionary Convergence in Buchnera–*Serratia* Symbiotic Consortia between the Distantly Related  
776 Lachninae Aphids *Tuberolachnus salignus* and *Cinara cedri*. *Genome Biol Evol* 8:1440–1458.  
777 <https://doi.org/10.1093/gbe/evw085>
- 778 Manzano-Marín A, Szabó G, Simon J-C, et al (2017) Happens in the best of subfamilies: establishment and  
779 repeated replacements of co-obligate secondary endosymbionts within Lachninae aphids. *Environ*  
780 *Microbiol* 19:393–408. <https://doi.org/10.1111/1462-2920.13633>
- 781 Manzano-Marín A, Coeur D’acier A, Clamens A-L, et al (2020) Serial horizontal transfer of vitamin-  
782 biosynthetic genes enables the establishment of new nutritional symbionts in aphids’ di-symbiotic  
783 systems. *ISME J* 14:259–273. <https://doi.org/10.1038/s41396-019-0533-6>
- 784 Mao M, Bennett GM (2020) Symbiont replacements reset the co-evolutionary relationship between insects  
785 and their heritable bacteria. *ISME J* 14:1384–1395. <https://doi.org/10.1038/s41396-020-0616-4>
- 786 Masson F, Copete SC, Schüpfer F, et al (2018) In Vitro Culture of the Insect Endosymbiont *Spiroplasma*  
787 *poulsonii* Highlights Bacterial Genes Involved in Host-Symbiont Interaction. *mBio* 9:  
788 <https://doi.org/10.1128/mBio.00024-18>
- 789 Matsuura Y, Moriyama M, Łukasik P, et al (2018) Recurrent symbiont recruitment from fungal parasites in  
790 cicadas. *Proc Natl Acad Sci* 115:E5970–E5979. <https://doi.org/10.1073/pnas.1803245115>
- 791 McFall-Ngai M, Hadfield MG, Bosch TCG, et al (2013) Animals in a bacterial world, a new imperative for the  
792 life sciences. *Proc Natl Acad Sci* 110:3229–3236. <https://doi.org/10.1073/pnas.1218525110>
- 793 McLean Ailsa H. C., Parker Benjamin J., Hrček Jan, et al (2016) Insect symbionts in food webs. *Philos Trans R*  
794 *Soc B Biol Sci* 371:20150325. <https://doi.org/10.1098/rstb.2015.0325>
- 795 Meseguer AS, Manzano-Marín A, d’Acier AC, et al (2017) Buchnera has changed flatmate but the repeated  
796 replacement of co-obligate symbionts is not associated with the ecological expansions of their aphid  
797 hosts. *Mol Ecol* 26:2363–2378. <https://doi.org/10.1111/mec.13910>
- 798 Monnin D, Jackson R, Kiers ET, et al (2020) Parallel Evolution in the Integration of a Co-obligate Aphid  
799 Symbiosis. *Curr Biol* 30:1949–1957.e6. <https://doi.org/10.1016/j.cub.2020.03.011>
- 800 Montllor CB, Maxmen A, Purcell AH (2002) Facultative bacterial endosymbionts benefit pea aphids  
801 *Acyrtosiphon pisum* under heat stress. *Ecol Entomol* 27:189–195. <https://doi.org/10.1046/j.1365-2311.2002.00393.x>



- 803 Moran NA (2007) Symbiosis as an adaptive process and source of phenotypic complexity. *Proc Natl Acad Sci*  
804 104:8627–8633. <https://doi.org/10.1073/pnas.0611659104>
- 805 Moran NA, Baumann P (2000) Bacterial endosymbionts in animals. *Curr Opin Microbiol* 3:270–275.  
806 [https://doi.org/10.1016/S1369-5274\(00\)00088-6](https://doi.org/10.1016/S1369-5274(00)00088-6)
- 807 Moran NA, Russell JA, Koga R, Fukatsu T (2005) Evolutionary Relationships of Three New Species of  
808 Enterobacteriaceae Living as Symbionts of Aphids and Other Insects. *Appl Environ Microbiol*  
809 71:3302–3310. <https://doi.org/10.1128/AEM.71.6.3302-3310.2005>
- 810 Moran NA, Yun Y (2015) Experimental replacement of an obligate insect symbiont. *Proc Natl Acad Sci*  
811 112:2093–2096. <https://doi.org/10.1073/pnas.1420037112>
- 812 Nadarasah G, Stavrinides J (2011) Insects as alternative hosts for phytopathogenic bacteria. *FEMS Microbiol*  
813 *Rev* 35:555–575. <https://doi.org/10.1111/j.1574-6976.2011.00264.x>
- 814 Nikoh N, Koga R, Oshima K, et al (2019) Genome Sequence of “*Candidatus Serratia symbiotica*” Strain IS, a  
815 Facultative Bacterial Symbiont of the Pea Aphid *Acyrtosiphon pisum*. *Microbiol Resour Announc* 8:  
816 <https://doi.org/10.1128/MRA.00272-19>
- 817 Nylander JAA, Wilgenbusch JC, Warren DL, Swofford DL (2008) AWTY (are we there yet?): a system for  
818 graphical exploration of MCMC convergence in Bayesian phylogenetics. *Bioinformatics* 24:581–583.  
819 <https://doi.org/10.1093/bioinformatics/btm388>
- 820 Oliver KM, Degnan PH, Burke GR, Moran NA (2010) Facultative Symbionts in Aphids and the Horizontal  
821 Transfer of Ecologically Important Traits. *Annu Rev Entomol* 55:247–266.  
822 <https://doi.org/10.1146/annurev-ento-112408-085305>
- 823 Oliver KM, Russell JA, Moran NA, Hunter MS (2003) Facultative bacterial symbionts in aphids confer  
824 resistance to parasitic wasps. *Proc Natl Acad Sci* 100:1803–1807.  
825 <https://doi.org/10.1073/pnas.0335320100>
- 826 Oliver KM, Smith AH, Russell JA (2014) Defensive symbiosis in the real world – advancing ecological studies  
827 of heritable, protective bacteria in aphids and beyond. *Funct Ecol* 28:341–355.  
828 <https://doi.org/10.1111/1365-2435.12133>
- 829 Perreau J, Patel DJ, Anderson H, et al (2020) Vertical transmission at the pathogen-symbiont interface:  
830 *Serratia symbiotica* and aphids. *bioRxiv* 2020.09.01.279018.  
831 <https://doi.org/10.1101/2020.09.01.279018>
- 832 Petersen LM, Tisa LS (2013) Friend or foe? A review of the mechanisms that drive *Serratia* towards diverse  
833 lifestyles. *Can J Microbiol* 59:627–640. <https://doi.org/10.1139/cjm-2013-0343>
- 834 Pons I, Renoz F, Noël C, Hance T (2019a) New Insights into the Nature of Symbiotic Associations in Aphids:  
835 Infection Process, Biological Effects and Transmission Mode of Cultivable *Serratia symbiotica*  
836 Bacteria. *Appl Env Microbiol AEM*.02445-18. <https://doi.org/10.1128/AEM.02445-18>
- 837 Pons I, Renoz F, Noël C, Hance T (2019b) Circulation of the Cultivable Symbiont *Serratia symbiotica* in Aphids  
838 Is Mediated by Plants. *Front. Microbiol.*
- 839 Reemer M, Rotheray G (2009) Pollen feeding larvae in the presumed predatory syrphine genus *Toxomerus*  
840 *Macquart* (Diptera, Syrphidae). *J. Nat. Hist.*

- 841 Renoz F, Ambroise J, Bearzatto B, et al (2020) Draft Genome Sequences of Two Cultivable Strains of the  
842 Bacterial Symbiont *Serratia symbiotica*. *Microbiol Resour Announc* 9:  
843 <https://doi.org/10.1128/MRA.01579-19>
- 844 Renoz F, Pons I, Vanderpoorten A, et al (2018) Evidence for Gut-Associated *Serratia symbiotica* in Wild  
845 Aphids and Ants Provides New Perspectives on the Evolution of Bacterial Mutualism in Insects.  
846 *Microb Ecol*. <https://doi.org/10.1007/s00248-018-1265-2>
- 847 Ronquist F, Teslenko M, van der Mark P, et al (2012) MrBayes 3.2: Efficient Bayesian Phylogenetic Inference  
848 and Model Choice Across a Large Model Space. *Syst Biol* 61:539–542.  
849 <https://doi.org/10.1093/sysbio/sys029>
- 850 Russell JA, Latorre A, Sabater-Muñoz B, et al (2003) Side-stepping secondary symbionts: widespread  
851 horizontal transfer across and beyond the Aphidoidea. *Mol Ecol* 12:1061–1075
- 852 Russell JA, Moran NA (2006) Costs and benefits of symbiont infection in aphids: variation among symbionts  
853 and across temperatures. *Proc Biol Sci* 273:603–610. <https://doi.org/10.1098/rspb.2005.3348>
- 854 Sabri A, Leroy P, Haubruge E, et al (2011) Isolation, pure culture and characterization of *Serratia symbiotica*  
855 sp. nov., the R-type of secondary endosymbiont of the black bean aphid *Aphis fabae*. *Int J Syst Evol*  
856 *Microbiol* 61:2081–2088. <https://doi.org/10.1099/ijs.0.024133-0>
- 857 Salem H, Florez L, Gerardo N, Kaltenpoth M (2015) An out-of-body experience: the extracellular dimension  
858 for the transmission of mutualistic bacteria in insects. *Proc R Soc Lond B Biol Sci* 282:20142957.  
859 <https://doi.org/10.1098/rspb.2014.2957>
- 860 Santos-Garcia D, Silva FJ, Morin S, et al (2017) The All-Rounder *Sodalis*: A New Bacteriome-Associated  
861 Endosymbiont of the Lygaeoid Bug *Henestaris halophilus* (Heteroptera: Henestarinae) and a Critical  
862 Examination of Its Evolution. *Genome Biol Evol* 9:2893–2910. <https://doi.org/10.1093/gbe/evx202>
- 863 Schwarz RS, Teixeira ÉW, Tauber JP, et al (2014) Honey bee colonies act as reservoirs for two *Spiroplasma*  
864 facultative symbionts and incur complex, multiyear infection dynamics. *MicrobiologyOpen* 3:341–  
865 355. <https://doi.org/https://doi.org/10.1002/mbo3.172>
- 866 Skaljic M, Vogel H, Wielsch N, et al (2019) Transmission of a Protease-Secreting Bacterial Symbiont Among  
867 Pea Aphids via Host Plants. *Front Physiol* 10:. <https://doi.org/10.3389/fphys.2019.00438>
- 868 Su Q, Oliver KM, Pan H, et al (2013) Facultative Symbiont *Hamiltonella* Confers Benefits to *Bemisia tabaci*  
869 (Hemiptera: Aleyrodidae), an Invasive Agricultural Pest Worldwide. *Environ Entomol* 42:1265–1271.  
870 <https://doi.org/10.1603/EN13182>
- 871 Sudakaran S, Kost C, Kaltenpoth M (2017) Symbiont Acquisition and Replacement as a Source of Ecological  
872 Innovation. *Trends Microbiol* 25:375–390. <https://doi.org/10.1016/j.tim.2017.02.014>
- 873 Takeshita K, Kikuchi Y (2017) *Riptortus pedestris* and *Burkholderia* symbiont: an ideal model system for  
874 insect–microbe symbiotic associations. *Res Microbiol* 168:175–187.  
875 <https://doi.org/10.1016/j.resmic.2016.11.005>
- 876 Tsuchida T, Koga R, Fukatsu T (2004) Host plant specialization governed by facultative symbiont. *Science*  
877 303:1989. <https://doi.org/10.1126/science.1094611>
- 878 Vorburger C, Gousskov A (2011) Only helpful when required: a longevity cost of harbouring defensive  
879 symbionts. *J Evol Biol* 24:1611–1617. <https://doi.org/10.1111/j.1420-9101.2011.02292.x>



880 Webster NS, Reusch TBH (2017) Microbial contributions to the persistence of coral reefs. *ISME J* 11:2167–  
881 2174. <https://doi.org/10.1038/ismej.2017.66>

882 Wernegreen JJ (2017) In it for the long haul: evolutionary consequences of persistent endosymbiosis. *Curr*  
883 *Opin Genet Dev* 47:83–90. <https://doi.org/10.1016/j.gde.2017.08.006>

884 Zytynska SE, Tighiouart K, Frago E (2021) The benefits and costs of hosting facultative symbionts in plant-  
885 sucking insects: a meta-analysis. *Mol Ecol* n/a: <https://doi.org/https://doi.org/10.1111/mec.15897>

886 Zytynska SE, Weisser WW (2016) The natural occurrence of secondary bacterial symbionts in aphids. *Ecol*  
887 *Entomol* 41:13–26. <https://doi.org/10.1111/een.12281>

888

889

890

891

892

893

894

895

896

897

898

899

900

901

902

903 **FIGURES AND TABLES**

904

905

906

907

908

909

910

911

912

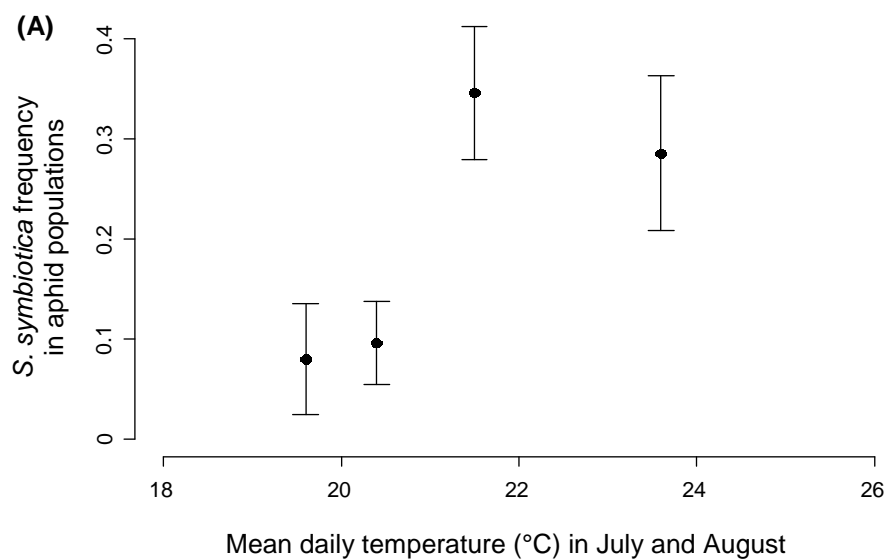

913

914

915

916

917

918

919

920

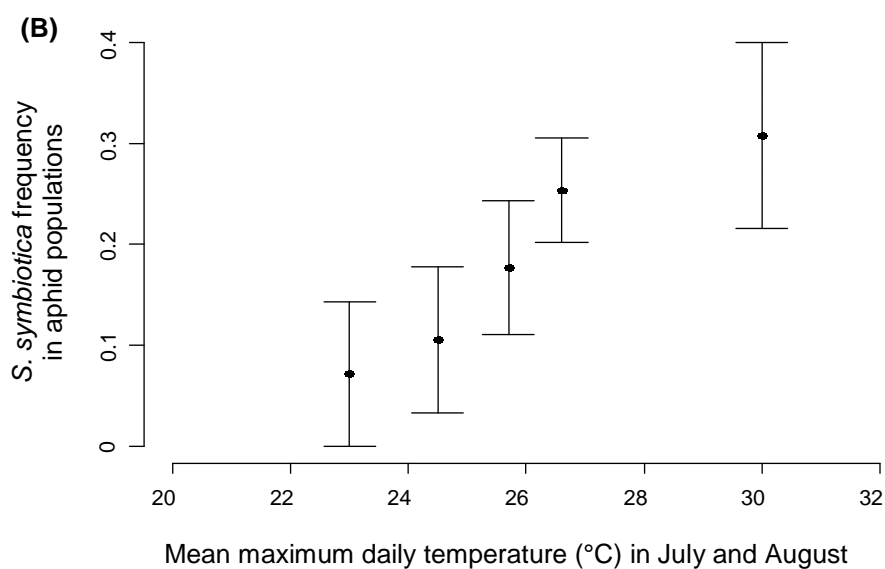

921

922

923 **Figure 1.** Relationships between *S. symbiotica* frequency across Belgian aphid populations and the  
924 mean daily temperature (A) or the maximum daily temperature (B) during sampling.

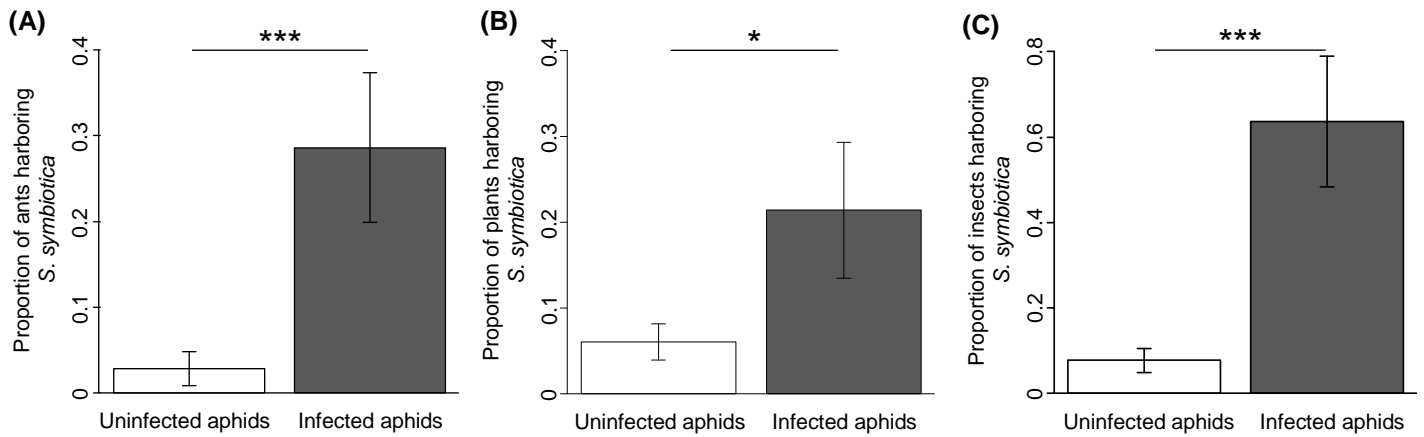

925

926 **Figure 2.** Prevalence of *S. symbiotica* in tending ants (A), plant samples (B) and associated insects (C)  
927 differ depending on the infection status of the aphid colonies. Columns represent the proportion of  
928 samples infected with *S. symbiotica* according to uninfected aphid colonies (white) or infected aphid  
929 colonies (dark grey). Error bars depict the standard error. Asterisks show significant differences (\*:  
930  $p < 0.05$ , and \*\*\*:  $p < 0.001$ ).

931

932

933

934

935

936

937

938

939

940

941

942

943

944

945

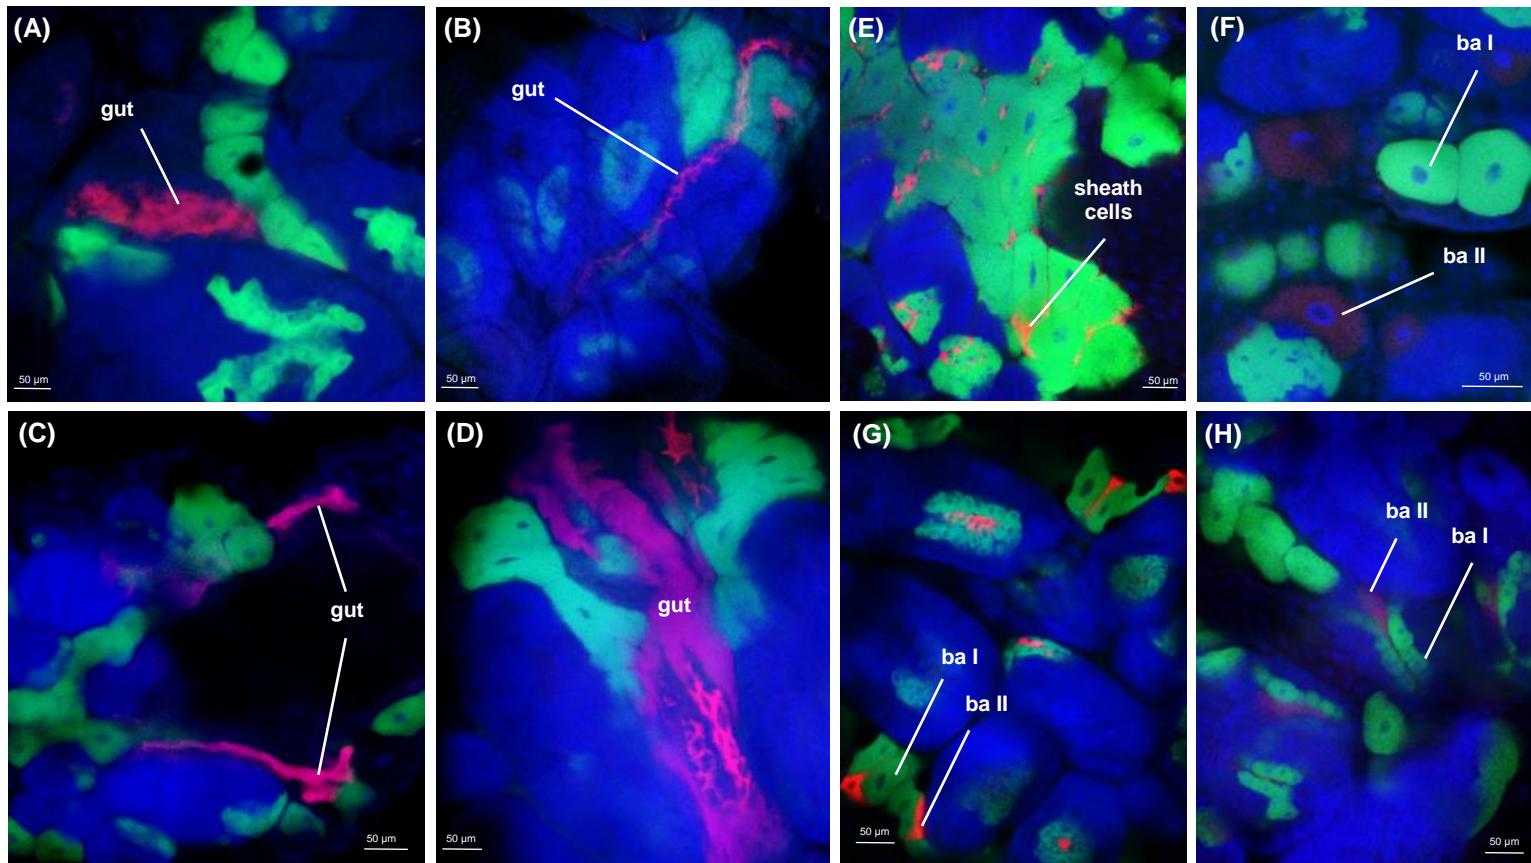

960

961

962 **Figure 3.** Whole-mount FISH of *S. symbiotica* in naturally infected aphids (ventral views). Red Cy3  
963 signals are *S. symbiotica*, green Cy5 signals are *B. aphidicola*, and blue SYTOX Green signals are  
964 aphid tissues. (A-D) *S. symbiotica* found residing at the gut level of aphids. (E) *S. symbiotica* found  
965 residing at the sheath cells level of aphids. (F-H) *S. symbiotica* found residing at the bacteriocytes  
966 level of aphids (ba I: primary bacteriocyte and ba II: secondary bacteriocyte). (A) *Aphis grossulariae*  
967 (ID 491), (B) *Capitophorus elaeagni* (ID 605), (C) *Aphis fabae* (ID 517), (D) *Aphis pomi* (ID 511),  
968 (E) *Macrosiphum rosae* (ID 263), (F) *Macrosiphum mordvilkoii* (ID 135), (G) *Periphyllus*  
969 *testudinaceus* (ID 1), and (H) *Aphis fabae* (ID 380).

970

971

972

973

974

975

976

977

978

979

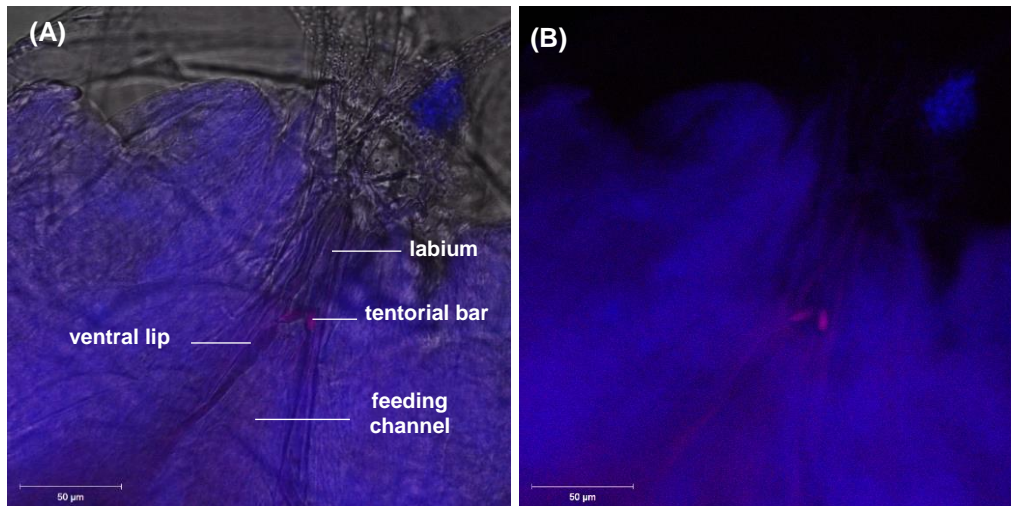

980

981 **Figure 4.** Whole-mount FISH of *S. symbiotica* in a naturally infected hoverfly larva (Prothorax, ventral  
982 view). Red Cy3 signals are *S. symbiotica*, and blue SYTOX Green signals are insect tissues. A is with  
983 bright field and B is without bright field. *S. symbiotica* is located at the level of the tentorial bar, near  
984 the true mouth (Reemer and Rotheray 2009).

985

986

987

988

989

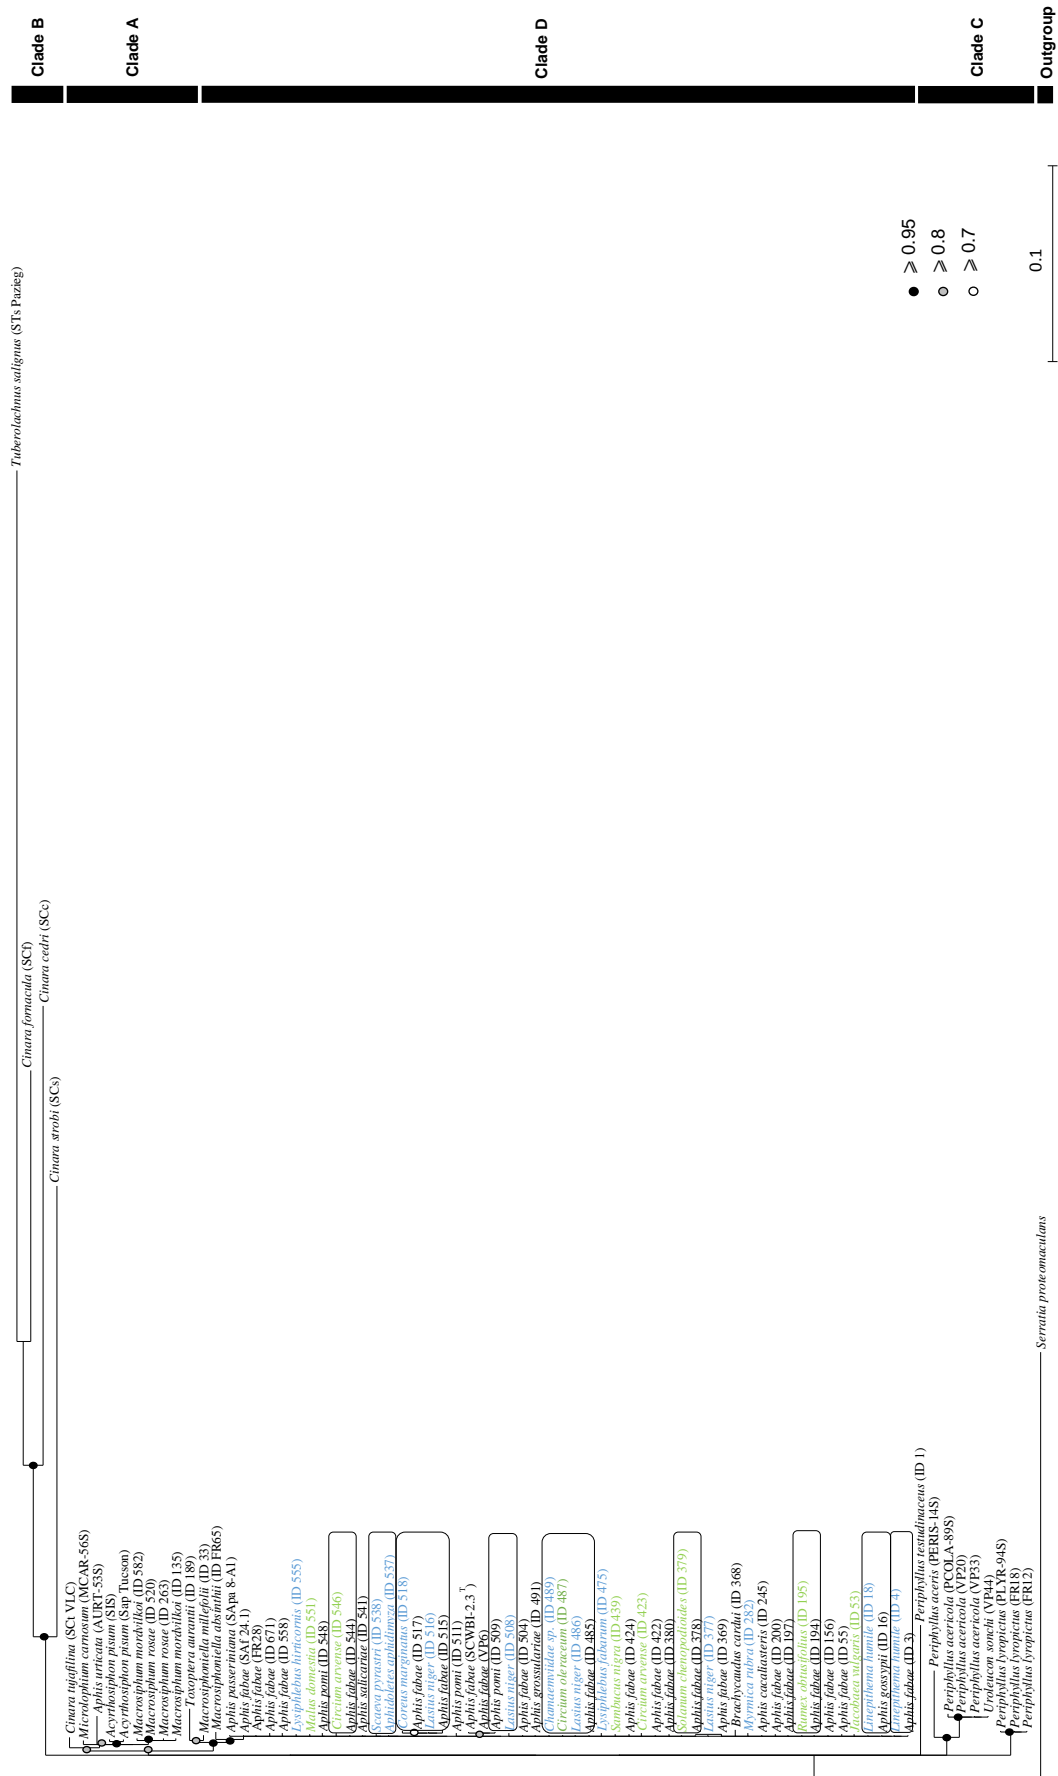

991 **Figure 5.** *Serratia symbiotica* phylogeny constructed using MrBayes analysis based on concatenated  
992 sequences of the *accD*, *gyrB*, *murE* and *recJ* genes. The names given for each terminal node reflect  
993 the taxonomic identity of the host from which the *S. symbiotica* strain was sequenced, followed by the  
994 names of the *S. symbiotica* strains. Circles on branches indicate Bayesian posterior probabilities: black  
995 circles for probabilities greater than or equal to 0.95, grey circles for probabilities between 0.94 and  
996 0.8, and white circles for probabilities between 0.79 and 0.7. The black names indicate the aphid  
997 samples, the green names indicate the aphid host plant samples and the blue names the insect samples  
998 associated to the aphid colonies. Rectangles correspond to individuals belonging to the same colony.  
999 Clade D correspond to the clade D of the previous study (Renoz et al. 2018) grouping the strains  
1000 isolated and exhibiting a free-living capacity in laboratory conditions as well as strains exhibiting aphid  
1001 gut infection.

1002

1003

1004

1005

1006

1007

1008

1009

1010

1011 **Table 1.** Summary of the natural occurrence of *S. symbiotica* within 250 aphid colonies, across the  
 1012 different aphid genera. Aphids positive to specific primers correspond to aphids positive to the three  
 1013 primers designed to detect *S. symbiotica* strains with a potential gut localization.

| Aphid genus             | Number of colonies | Positive to <i>S. symbiotica</i> |
|-------------------------|--------------------|----------------------------------|
| <b>Aphidinae</b>        |                    |                                  |
| Macrosophini            |                    |                                  |
| <i>Acyrtosiphon</i>     | 3                  | 0                                |
| <i>Brachycaudus</i>     | 3                  | 1                                |
| <i>Capitophorus</i>     | 1                  | 1                                |
| <i>Cavariella</i>       | 5                  | 2                                |
| <i>Corylobium</i>       | 1                  | 0                                |
| <i>Dysaphis</i>         | 1                  | 0                                |
| <i>Hyadaphis</i>        | 1                  | 0                                |
| <i>Hyalopteroides</i>   | 4                  | 1                                |
| <i>Hyperomyzus</i>      | 10                 | 0                                |
| <i>Macrosiphoniella</i> | 8                  | 1                                |
| <i>Macrosiphum</i>      | 5                  | 4                                |
| <i>Megoura</i>          | 1                  | 0                                |
| <i>Metopeurum</i>       | 2                  | 0                                |
| <i>Metopolophium</i>    | 4                  | 0                                |
| <i>Myzus</i>            | 1                  | 0                                |
| <i>Sitobion</i>         | 8                  | 1                                |
| <i>Straticobium</i>     | 1                  | 0                                |
| <i>Uroleucon</i>        | 49                 | 0                                |
| Aphidini                |                    |                                  |
| <i>Aphis</i>            | 121                | 35                               |
| <i>Hyalopterus</i>      | 3                  | 0                                |
| <i>Rhopalosiphum</i>    | 1                  | 0                                |
| <i>Schizaphis</i>       | 3                  | 2                                |
| <i>Toxoptera</i>        | 6                  | 2                                |
| <b>Chaitophorinae</b>   |                    |                                  |
| Chaitophorini           |                    |                                  |
| <i>Chaitophorus</i>     | 1                  | 0                                |
| <i>Periphyllus</i>      | 1                  | 1                                |
| <b>Calaphidinae</b>     |                    |                                  |
| Panaphidini             |                    |                                  |
| <i>Pterocallis</i>      | 1                  | 0                                |
| <i>Tinocallis</i>       | 1                  | 0                                |
| Not identified          | 4                  | 0                                |
| <b>Total</b>            | <b>250</b>         | <b>51</b>                        |

1014

1015

1016



1017 **Table 2.** Summary of the natural occurrence of *S. symbiotica* within 161 host plants. Plants positive to  
 1018 specific primers correspond to plants positive to the three primers designed to detect *S. symbiotica*  
 1019 strains with a potential localization in aphid gut and free-living capacity. The number of plants  
 1020 associated with infected aphids, as well as the number of plants infected with *S. symbiotica* associated  
 1021 with infected aphids were considered.

| Plant genus         | Number of samples | Positive to <i>S. symbiotica</i> | Plant associated with infected aphids |                                                             | Infected plant associated with infected aphids |                      |
|---------------------|-------------------|----------------------------------|---------------------------------------|-------------------------------------------------------------|------------------------------------------------|----------------------|
|                     |                   |                                  | Number                                | Infected Aphid genus                                        | Number                                         | Infected Aphid genus |
| <i>Achillea</i>     | 1                 | 0                                | 1                                     | <i>Macrosiphoniella</i>                                     | 0                                              | -                    |
| <i>Artemisia</i>    | 5                 | 0                                | 0                                     | -                                                           | 0                                              | -                    |
| <i>Campanula</i>    | 1                 | 0                                | 0                                     | -                                                           | 0                                              | -                    |
| <i>Centaurea</i>    | 2                 | 0                                | 0                                     | -                                                           | 0                                              | -                    |
| <i>Centranthus</i>  | 1                 | 0                                | 0                                     | -                                                           | 0                                              | -                    |
| <i>Chaenomeles</i>  | 1                 | 0                                | 0                                     | -                                                           | 0                                              | -                    |
| <i>Chenopodium</i>  | 2                 | 0                                | 0                                     | -                                                           | 0                                              | -                    |
| <i>Cirsium</i>      | 26                | 4                                | 7                                     | <i>Aphis,</i><br><i>Capitophorus,</i><br><i>Macrosiphum</i> | 3                                              | <i>Aphis</i>         |
| <i>Clematis</i>     | 1                 | 0                                | 1                                     | <i>Aphis</i>                                                | 0                                              | -                    |
| <i>Conyza</i>       | 1                 | 0                                | 0                                     | -                                                           | 0                                              | -                    |
| <i>Corylus</i>      | 2                 | 0                                | 0                                     | -                                                           | 0                                              | -                    |
| <i>Crataegus</i>    | 1                 | 0                                | 0                                     | -                                                           | 0                                              | -                    |
| <i>Crepis</i>       | 1                 | 0                                | 0                                     | -                                                           | 0                                              | -                    |
| <i>Daucus</i>       | 8                 | 0                                | 2                                     | <i>Aphis</i>                                                | 0                                              | -                    |
| <i>Epilobium</i>    | 10                | 0                                | 2                                     | <i>Aphis</i>                                                | 0                                              | -                    |
| <i>Epipactis</i>    | 2                 | 0                                | 0                                     | -                                                           | 0                                              | -                    |
| <i>Eupatorium</i>   | 2                 | 0                                | 1                                     | <i>Aphis</i>                                                | 0                                              | -                    |
| <i>Gaillet</i>      | 1                 | 0                                | 0                                     | -                                                           | 0                                              | -                    |
| <i>Glebionis</i>    | 1                 | 0                                | 0                                     | -                                                           | 0                                              | -                    |
| <i>Hedera</i>       | 1                 | 0                                | 1                                     | <i>Aphis</i>                                                | 0                                              | -                    |
| <i>Heracleum</i>    | 7                 | 1                                | 2                                     | <i>Aphis, Cavariella</i>                                    | 0                                              | -                    |
| <i>Hibiscus</i>     | 1                 | 0                                | 0                                     | -                                                           | 0                                              | -                    |
| <i>Jacobaea</i>     | 6                 | 1                                | 2                                     | <i>Aphis</i>                                                | 0                                              | -                    |
| <i>Lactuca</i>      | 2                 | 0                                | 0                                     | -                                                           | 0                                              | -                    |
| <i>Laphangium</i>   | 2                 | 0                                | 2                                     | <i>Aphis,</i><br><i>Brachycaudus</i>                        | 0                                              | -                    |
| <i>Leucanthemum</i> | 3                 | 0                                | 2                                     | <i>Aphis</i>                                                | 0                                              | -                    |
| <i>Lythrum</i>      | 1                 | 0                                | 0                                     | -                                                           | 0                                              | -                    |
| <i>Malus</i>        | 1                 | 1                                | 0                                     | -                                                           | 0                                              | -                    |
| <i>Oenothera</i>    | 1                 | 0                                | 0                                     | -                                                           | 0                                              | -                    |
| <i>Phragmites</i>   | 3                 | 0                                | 0                                     | -                                                           | 0                                              | -                    |
| <i>Populus</i>      | 1                 | 0                                | 0                                     | -                                                           | 0                                              | -                    |
| <i>Ranunculus</i>   | 1                 | 1                                | 0                                     | -                                                           | 0                                              | -                    |
| <i>Robinia</i>      | 2                 | 0                                | 0                                     | -                                                           | 0                                              | -                    |
| <i>Rosa</i>         | 3                 | 0                                | 2                                     | <i>Macrosiphum</i>                                          | 0                                              | -                    |
| <i>Rumex</i>        | 8                 | 2                                | 2                                     | <i>Aphis</i>                                                | 1                                              | <i>Aphis</i>         |
| <i>Salvia</i>       | 1                 | 0                                | 0                                     | -                                                           | 0                                              | -                    |
| <i>Sambucus</i>     | 1                 | 1                                | 1                                     | <i>Aphis</i>                                                | 1                                              | <i>Aphis</i>         |
| <i>Solanum</i>      | 2                 | 1                                | 1                                     | <i>Aphis</i>                                                | 1                                              | <i>Aphis</i>         |
| <i>Sonchus</i>      | 32                | 1                                | 0                                     | -                                                           | 0                                              | -                    |

|                  |            |           |           |          |          |          |
|------------------|------------|-----------|-----------|----------|----------|----------|
| <i>Spirea</i>    | 2          | 0         | 0         | -        | 0        | -        |
| <i>Symphytum</i> | 1          | 0         | 0         | -        | 0        | -        |
| <i>Tanacetum</i> | 6          | 1         | 0         | -        | 0        | -        |
| <i>Verbena</i>   | 2          | 0         | 0         | -        | 0        | -        |
| <i>Vesca</i>     | 1          | 0         | 0         | -        | 0        | -        |
| <i>Vicia</i>     | 1          | 0         | 0         | -        | 0        | -        |
| <b>Total</b>     | <b>161</b> | <b>14</b> | <b>37</b> | <b>-</b> | <b>6</b> | <b>-</b> |

1022

1023

1024 **Table 3.** Summary of the natural occurrence of *S. symbiotica* within 203 insects associated with aphid  
 1025 colonies. Insects positive to specific primers correspond to insects positive to the three primers  
 1026 designed to detect *S. symbiotica* strains with a potential localization in aphid gut and free-living  
 1027 capacity. The number of insects infected with *S. symbiotica* associated with infected aphids was  
 1028 considered.

| Insect genus              | Number of samples | Positive to <i>S. symbiotica</i> | Infected insect associated with infected aphids |                      |
|---------------------------|-------------------|----------------------------------|-------------------------------------------------|----------------------|
|                           |                   |                                  | Number                                          | Infected Aphid genus |
| <b>Ants</b>               |                   |                                  |                                                 |                      |
| <i>Camponotus</i>         | 3                 | 0                                | -                                               | -                    |
| <i>Formica</i>            | 1                 | 0                                | -                                               | -                    |
| <i>Lasius</i>             | 78                | 7                                | 6                                               | Capitophorus, Aphis  |
| <i>Linepithema</i>        | 2                 | 2                                | 2                                               | <i>Aphis</i>         |
| <i>Myrmica</i>            | 7                 | 1                                | 0                                               | -                    |
| Not identified            | 7                 | 0                                | -                                               | -                    |
| <b>Aphid Midge Larvae</b> |                   |                                  |                                                 |                      |
| <i>Aphidoletes</i>        | 7                 | 2                                | 1                                               | <i>Aphis</i>         |
| <b>Bugs</b>               |                   |                                  |                                                 |                      |
| <i>Coreus</i>             | 2                 | 1                                | 1                                               | <i>Aphis</i>         |
| <i>Deraeocoris</i>        | 1                 | 0                                | -                                               | -                    |
| <i>Dictyla</i>            | 2                 | 1                                | 0                                               | -                    |
| <i>Dicyphus</i>           | 1                 | 0                                | -                                               | -                    |
| <i>Dolycoris</i>          | 3                 | 0                                | -                                               | -                    |
| <i>Graphosoma</i>         | 1                 | 0                                | -                                               | -                    |
| <i>Malacocoris</i>        | 1                 | 0                                | -                                               | -                    |
| <i>Orius</i>              | 1                 | 0                                | -                                               | -                    |
| <i>Orthops</i>            | 1                 | 0                                | -                                               | -                    |
| <i>Pinalitus</i>          | 1                 | 0                                | -                                               | -                    |
| Not identified            | 1                 | 0                                | -                                               | -                    |
| <b>Fly Larvae</b>         |                   |                                  |                                                 |                      |
| <i>Chamaemyiidae</i>      | 1                 | 1                                | 1                                               | <i>Aphis</i>         |
| <b>Hoverfly Larvae</b>    |                   |                                  |                                                 |                      |
| <i>Episyrphus</i>         | 6                 | 1                                | 1                                               | <i>Aphis</i>         |
| <i>Eupeodes</i>           | 3                 | 0                                | -                                               | -                    |
| <i>Paragus</i>            | 7                 | 0                                | -                                               | -                    |
| <i>Platycheirus</i>       | 2                 | 0                                | -                                               | -                    |
| <i>Scaeva</i>             | 11                | 3                                | 1                                               | <i>Capitophorus</i>  |
| <i>Syrphus</i>            | 5                 | 0                                | -                                               | -                    |
| <b>Lacewing Larvae</b>    |                   |                                  |                                                 |                      |
| <i>Chrysoperla</i>        | 1                 | 0                                | -                                               | -                    |

| <b>Ladybugs</b>       |            |           |           |              |
|-----------------------|------------|-----------|-----------|--------------|
| <i>Coccinella</i>     | 8          | 1         | 0         | -            |
| <i>Harmonia</i>       | 7          | 1         | 1         | <i>Aphis</i> |
| <i>Hippodamia</i>     | 2          | 0         | -         | -            |
| <i>Propylea</i>       | 2          | 0         | -         | -            |
| <i>Rhyzobius</i>      | 1          | 0         | -         | -            |
| <i>Scymnus</i>        | 1          | 0         | -         | -            |
| Not identified        | 1          | 0         | -         | -            |
| <b>Moth Larvae</b>    |            |           |           |              |
| <i>Eupithecia</i>     | 3          | 1         | 1         | <i>Aphis</i> |
| <i>Hecatera</i>       | 1          | 0         | -         | -            |
| <i>Mompha</i>         | 1          | 0         | -         | -            |
| <i>Pieris</i>         | 1          | 0         | -         | -            |
| <b>Parasitoids</b>    |            |           |           |              |
| <i>Aphelinus</i>      | 1          | 0         | -         | -            |
| <i>Aphidius</i>       | 2          | 1         | 0         | -            |
| <i>Binodoxys</i>      | 2          | 0         | -         | -            |
| <i>Diglyphus</i>      | 1          | 0         | -         | -            |
| <i>Eulophinae</i>     | 1          | 0         | -         | -            |
| <i>Lysiphlebus</i>    | 7          | 2         | 0         | -            |
| <i>Pachyneuron</i>    | 1          | 0         | -         | -            |
| <i>Pnigalio</i>       | 1          | 0         | -         | -            |
| <i>Tetrastichinae</i> | 3          | 0         | -         | -            |
| <b>Total</b>          | <b>203</b> | <b>25</b> | <b>15</b> | -            |

1029
